# Supplementary material for: Gut microbes and the liver circadian clock partition glucose and lipid metabolism
Source: PubMed Central journal article supplement (PMC10503806; doi:10.1172/jci162515), 2023-09-15
Supplement: jci-133-162515-s233.pdf [file jci-133-162515-s233.pdf]

## **Supplemental Data**

### **Gut microbes and the liver circadian clock partition glucose and lipid metabolism**

Katya Frazier<sup>1,2</sup>, Sumeed Manzoor<sup>1</sup>, Katherine Carroll<sup>1</sup>, Orlando DeLeon<sup>1</sup>, Sawako Miyoshi<sup>3</sup>, Jun Miyoshi<sup>4</sup>, Marissa St George<sup>1</sup>, Alan Tan<sup>1</sup>, Evan A. Chrisler<sup>5</sup>, Mariko Izumo<sup>6</sup>, Joseph S. Takahashi<sup>6,7</sup>, Mrinalini C. Rao<sup>1</sup>, Vanessa A. Leone<sup>5#</sup>, & Eugene B. Chang<sup>1,2#</sup>

**Supplemental Figure 1, related to Figure 1. The liver circadian clock and gut microbes do not mediate insulin tolerance, hepatic glycogen, or ex vivo hepatic GNG.**

**(A)** Western blot of BMAL1 and GAPDH (control) in brain (frontal lobe, hypothalamus, cerebellum) and liver protein extracts collected at ZT16 from male *Bmal1<sup>fl/fl</sup>*(WT), *Bmal1<sup>fl/fl</sup> Alb-Cre* (LKO), and *Bmal1<sup>fl/fl</sup> Cam-Cre* (Forebrain-*Bmal1*-KO). **(B)** Body weight (left panel) and weekly food intake (right panel) from SPF and GF, WT and LKO male mice ( $n=18-32$ /group). **(C)** Liver (left panel) and mesenteric & gonadal (right panel) fat weight from SPF and GF, WT and LKO male mice, presented as percent of body weight ( $n=27-34$ /group). **(D)** Intraperitoneal Insulin Tolerance Test in SPF and GF, WT and LKO male mice (ITT,  $n=11-17$ /group). **(E)** PTT in SPF WT and Forebrain-*Bmal1*-KO male mice ( $n=11-16$ /group). **(F)** Glycogen content in liver tissue from SPF and GF WT vs LKO male mice collected every 4 hrs over 24 hrs from animals maintained in 12:12 LD ( $n=5-7$ /group); CircWave statistics indicate significantly oscillating ( $p<0.05$ ) or not oscillating ( $p>0.05$ ) values. **(G)** Glucose production by primary hepatocytes, isolated from SPF and GF WT vs LKO male mice, following 11 hrs of treatment with vehicle control (Basal) vs pCPT-cAMP, normalized to protein content and represented as arbitrary units (AU) ( $n=5$ /group). Data points represent mean $\pm$ SEM, box plots presented as median $\pm$ min/max. Two-tailed unpaired Welch's t tests were performed between 2 groups; Brown-Forsythe & Welch ANOVA followed by Dunnett's tests were performed between three or more groups; \*\*\*\* $p<0.0001$ , \*\*\* $p<0.001$ , \*\* $p<0.01$ , \* $p<0.05$ , ns=not significant; colored stars represent significance relative to SPF WT. Inset graph represents AUC normalized to baseline glucose values.

# Supplemental Figure 1

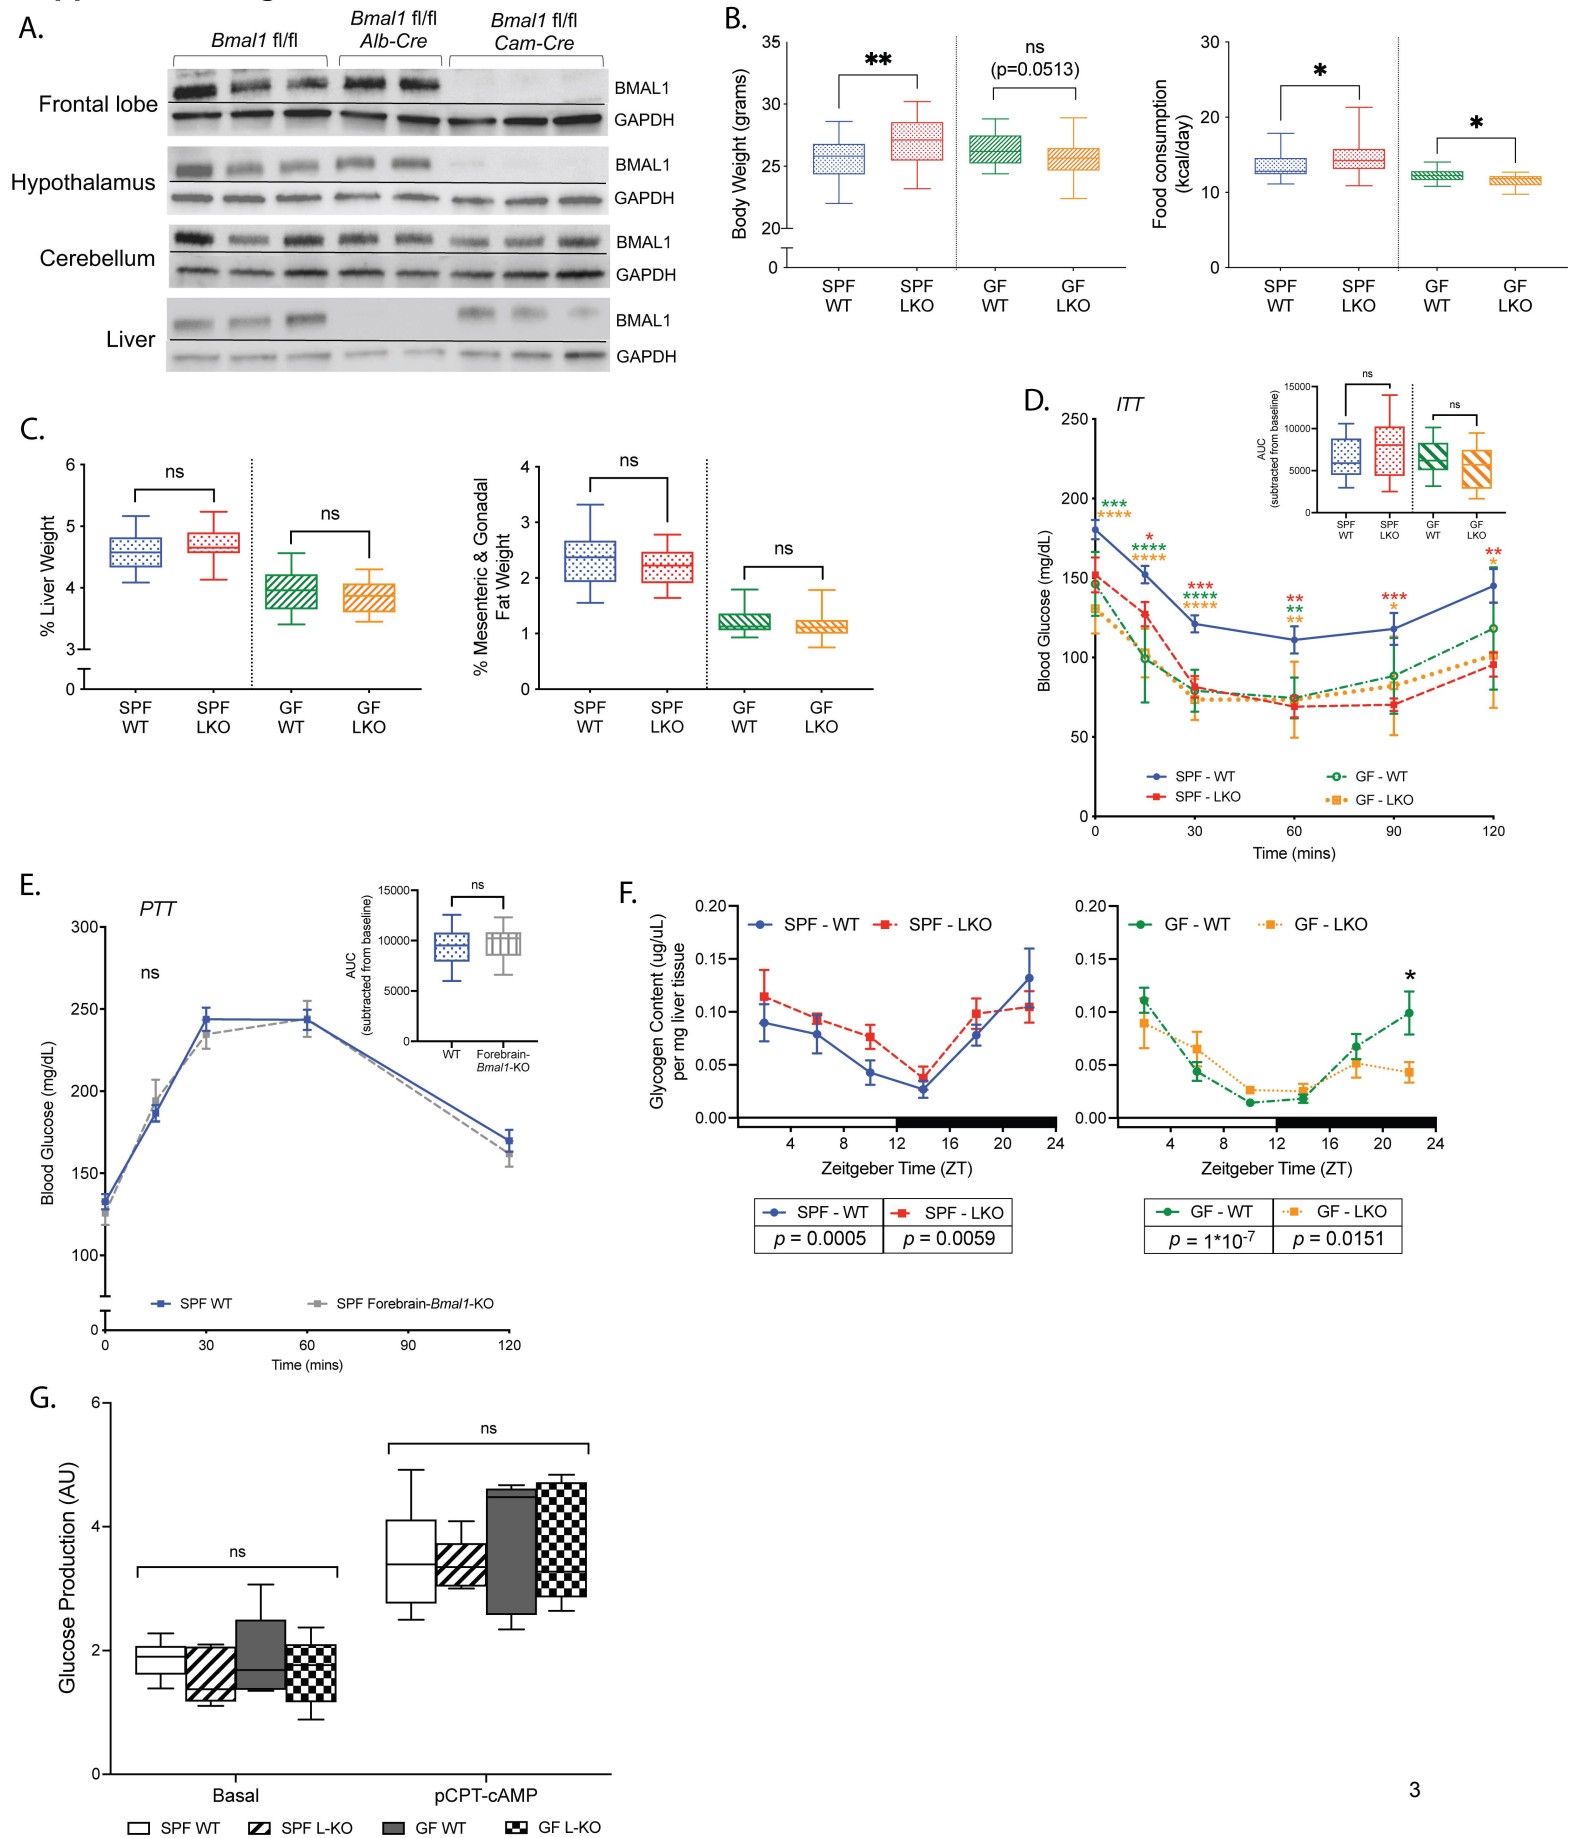

**Supplemental Figure 2, related to Figure 1. The liver circadian clock and gut microbes do not mediate glucose metabolism in female mice.**

**(A)** Body weight (left panel) and weekly food intake (right panel) from SPF and GF, WT and LKO male mice ( $n=26-34/\text{group}$ ). **(B)** Resting blood glucose levels measured via tail snip of SPF and GF, WT and LKO female mice every 4 hrs over 24 hrs ( $n=5-7/\text{group/timepoint}$ , SPF and GF groups also shown separately). CircWave statistics indicate significantly oscillating ( $p<0.05$ ) or not oscillating ( $p>0.05$ ) values. **(C)** GTT in SPF and GF, WT and LKO female mice ( $n=8-10/\text{group}$ ). **(D)** PTT in SPF WT and LKO female mice ( $n=13-14/\text{group}$ ). Data points represent mean $\pm$ SEM, box plots presented as median $\pm$ min/max. Two-tailed unpaired Welch's t tests were performed between 2 groups; Brown-Forsythe & Welch ANOVA followed by Dunnett's tests were performed between three or more groups; \*\* $p<0.01$ , \* $p<0.05$ , ns=not significant; colored stars represent significance relative to SPF WT. Inset graph represents AUC normalized to baseline glucose values.



# Supplemental Figure 2

A.

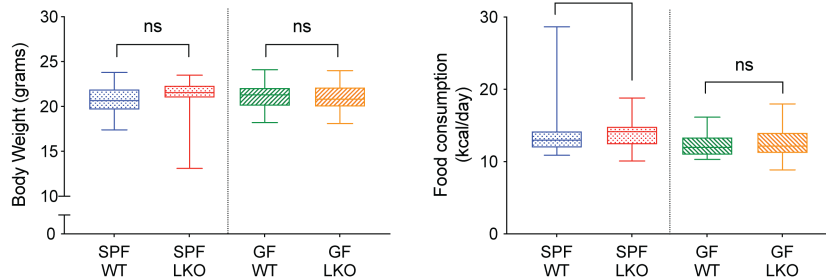

B.

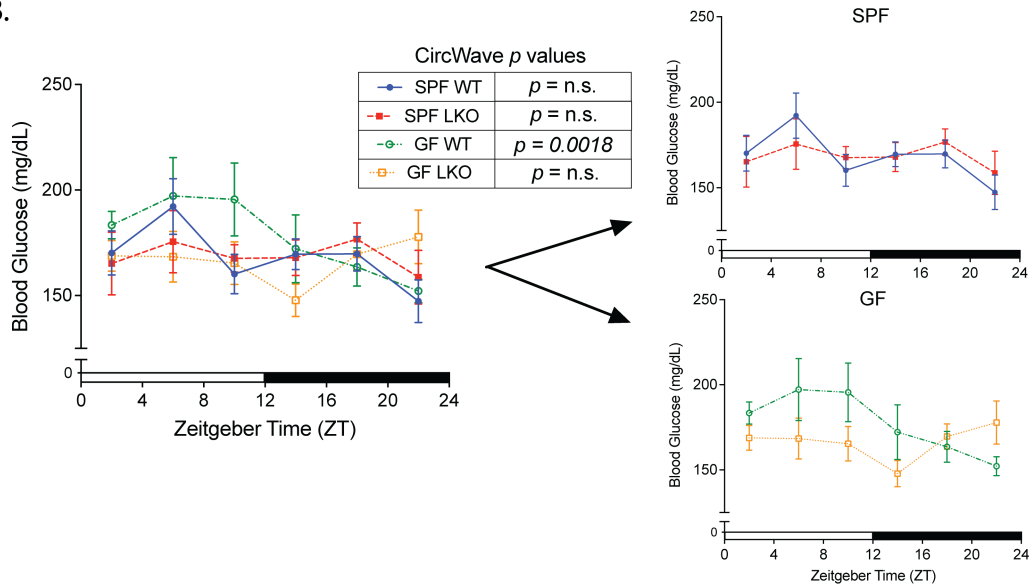

C.

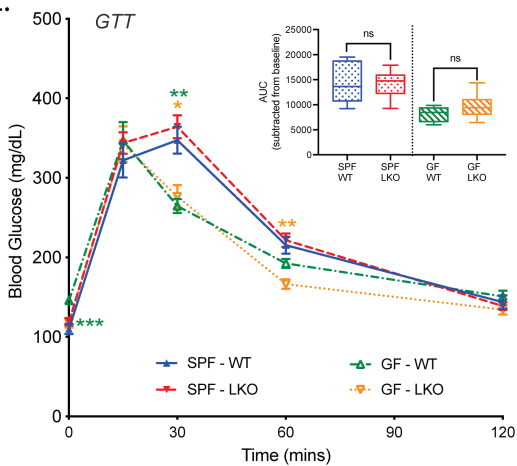

D.

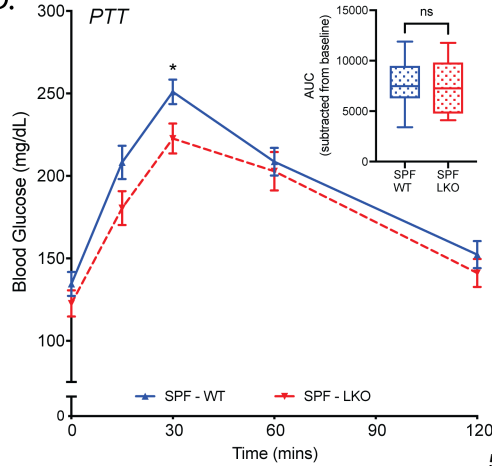

**Supplemental Figure 3, related to Figure 2. Liver circadian clock status does not impact gut microbial community membership.**

**(A)** 16S rRNA gene abundance in stool collected before (Pre-Abx) and after (Post-Abx) antibiotic treatment, measured via quantitative PCR and normalized to DNA concentration. **(B)** Experimental scheme of mixed vs. separate housing at time of weaning. **(C,D)** 16S rRNA gene sequencing analysis of stool collected from WT vs LKO male mice housed either by mixed genotypes (WT+LKO) or via separate housing of genotypes (WT+WT and LKO+LKO) ( $n=6-7/\text{group}$ ); abundance counts of major **(C)** and minor **(D)** phyla. **(E)** Principal Coordinate Analysis (PCoA) of Bray-Curtis and Weighted Unifrac beta diversity analyses, with PERMANOVA  $q$  value statistics. Box plots represent median $\pm$ min/max. Two-tailed unpaired Welch's  $t$  tests were performed between 2 groups; ns=not significant.

# Supplemental Figure 3

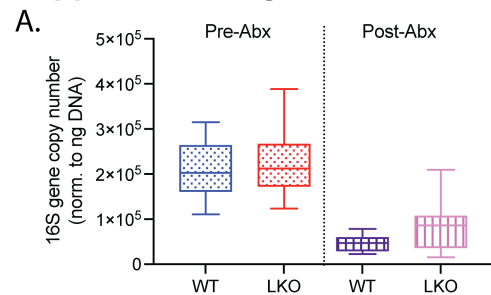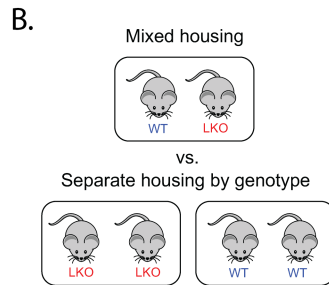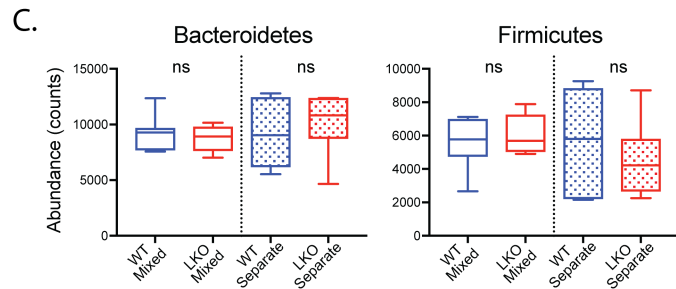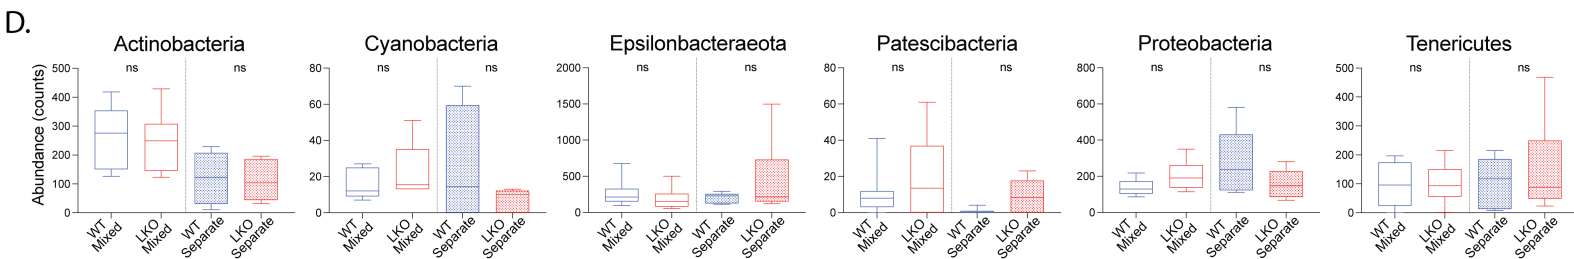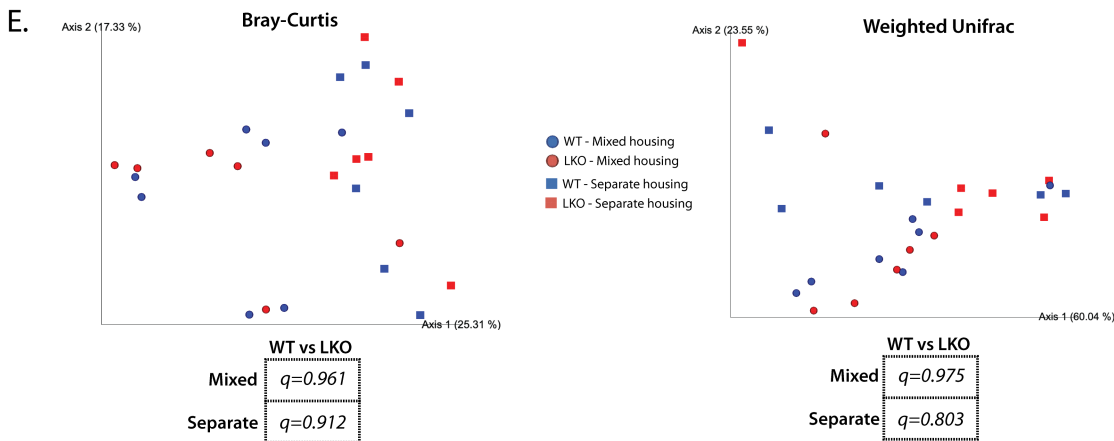

**Supplemental Figure 4, related to Figure 3. Loss of a functional liver clock in male mice results in increased abundance of oscillating ASVs.**

16S rRNA gene sequencing analysis of stool sampled from WT and LKO male mice every 6 hrs over two consecutive 24-hr LD cycles (8 samples per animal) via repeat collections from the same mouse ( $n=7-8$ /group). **(A)** Experimental scheme of 48-hr stool collection. **(B)** 16S rRNA gene abundance measured via qPCR normalized to DNA concentration. **(C)** Venn diagrams presenting total, shared, and unique oscillating ASVs among all taxonomic groups, as well as within specific classes Bacteroidales and Clostridiales. **(D)** Abundance counts of all oscillating ASVs. **(E)** Abundance counts of total vs oscillating ASVs within *Lactobacillus murinus*. Data points represent mean $\pm$ SEM. ns=not significant.

# Supplemental Figure 4

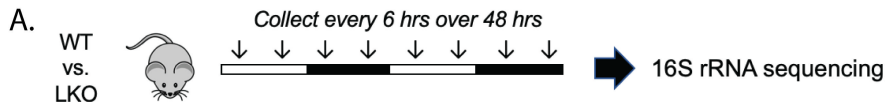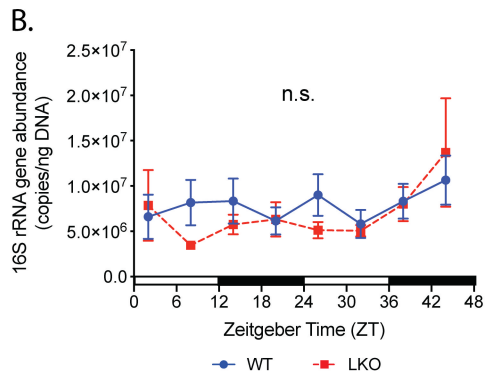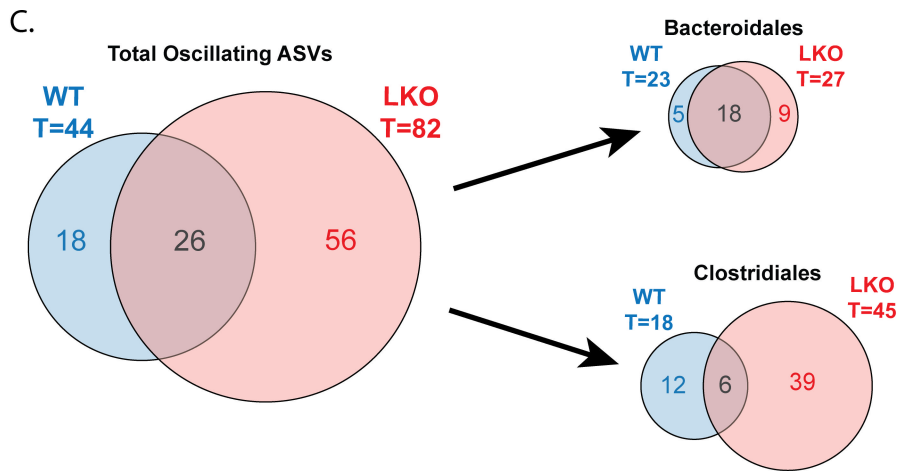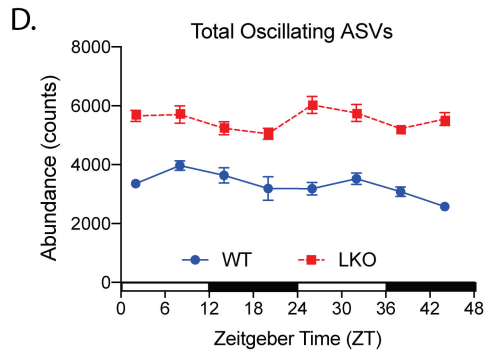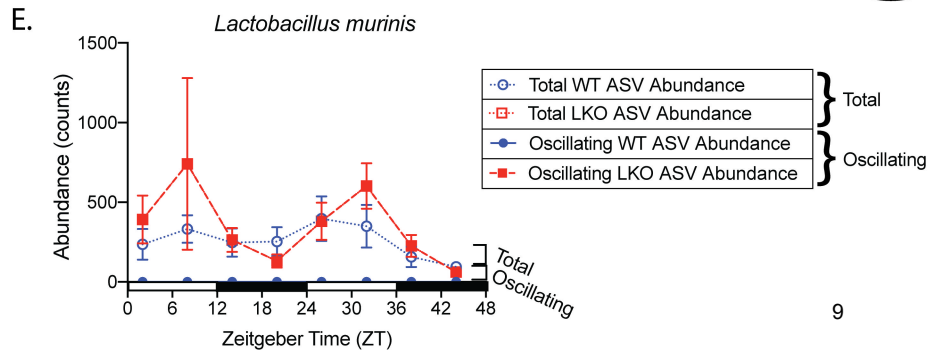

**Supplemental Figure 5, related to Figure 3. Loss of a functional liver clock in female mice results in no change in oscillating ASVs.**

16S rRNA gene sequencing analysis of stool sampled from WT and LKO female mice every 6 hrs over two consecutive 24-hr LD cycles (8 samples per animal) via repeat collections from the same mouse ( $n=8$ /group). **(A)** 16S rRNA gene abundance measured via qPCR normalized to DNA concentration. **(B)** Proportion of non-oscillating (grey area) vs significantly oscillating (colored areas) Amplicon Sequence Variants (ASVs) identified via eJTK ( $\text{GammaBH} < 0.05$ ); oscillating ASVs divided by taxonomic class. **(C)** Venn diagrams presenting total, shared, and unique oscillating ASVs among all taxonomic groups, as well as within specific classes Bacteroidales and Clostridiales. Data points represent  $\text{mean} \pm \text{SEM}$ . ns=not significant.

# Supplemental Figure 5

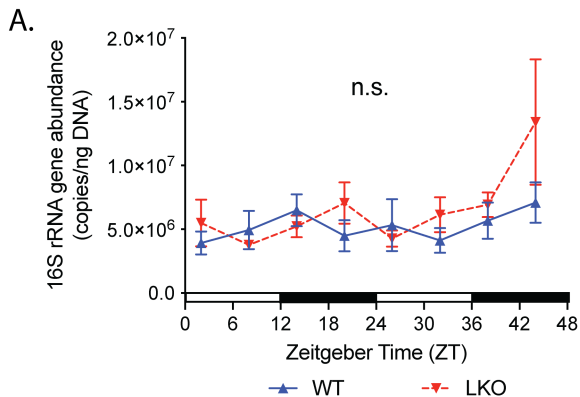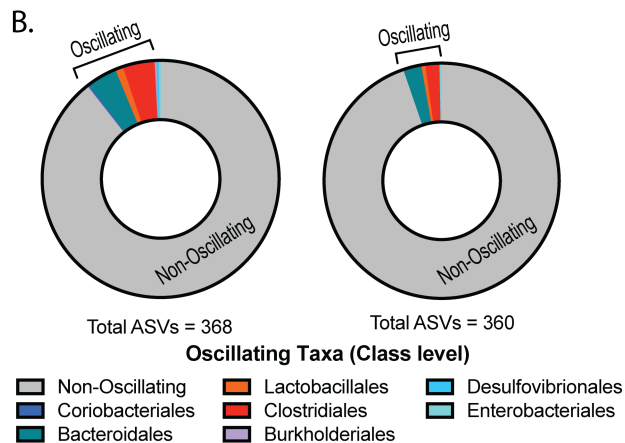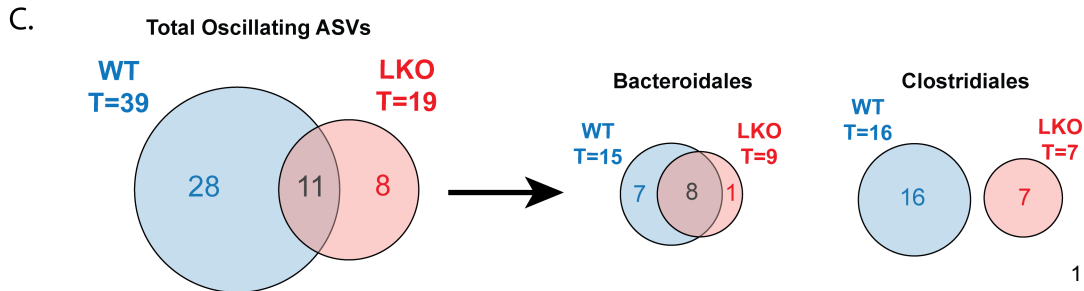

**Supplemental Figure 6, related to Figure 3. Loss of a functional liver clock in male mice results in an increase of oscillating ASVs by log-ratio analysis.**

16S rRNA gene sequencing analysis of stool sampled from WT and LKO male mice every 6 hrs over two consecutive 24-hr LD cycles (8 samples per animal) via repeat collections from the same mouse ( $n=7-8$ /group). **(A)** Log ratios (calculated by Songbird for each timepoint relative to ZT2) represented as a heatmap with hierarchically sorted ASVs within each taxonomic family. **(B)** Log ratios over time represented with LOESS fitting to visualize trends in each family. Taxa with large numbers of ASVs (Lachnospiraceae and Ruminococcaceae) separated by 3 leaf separations in the hierarchical clustering.



# Supplemental Figure 6

A.

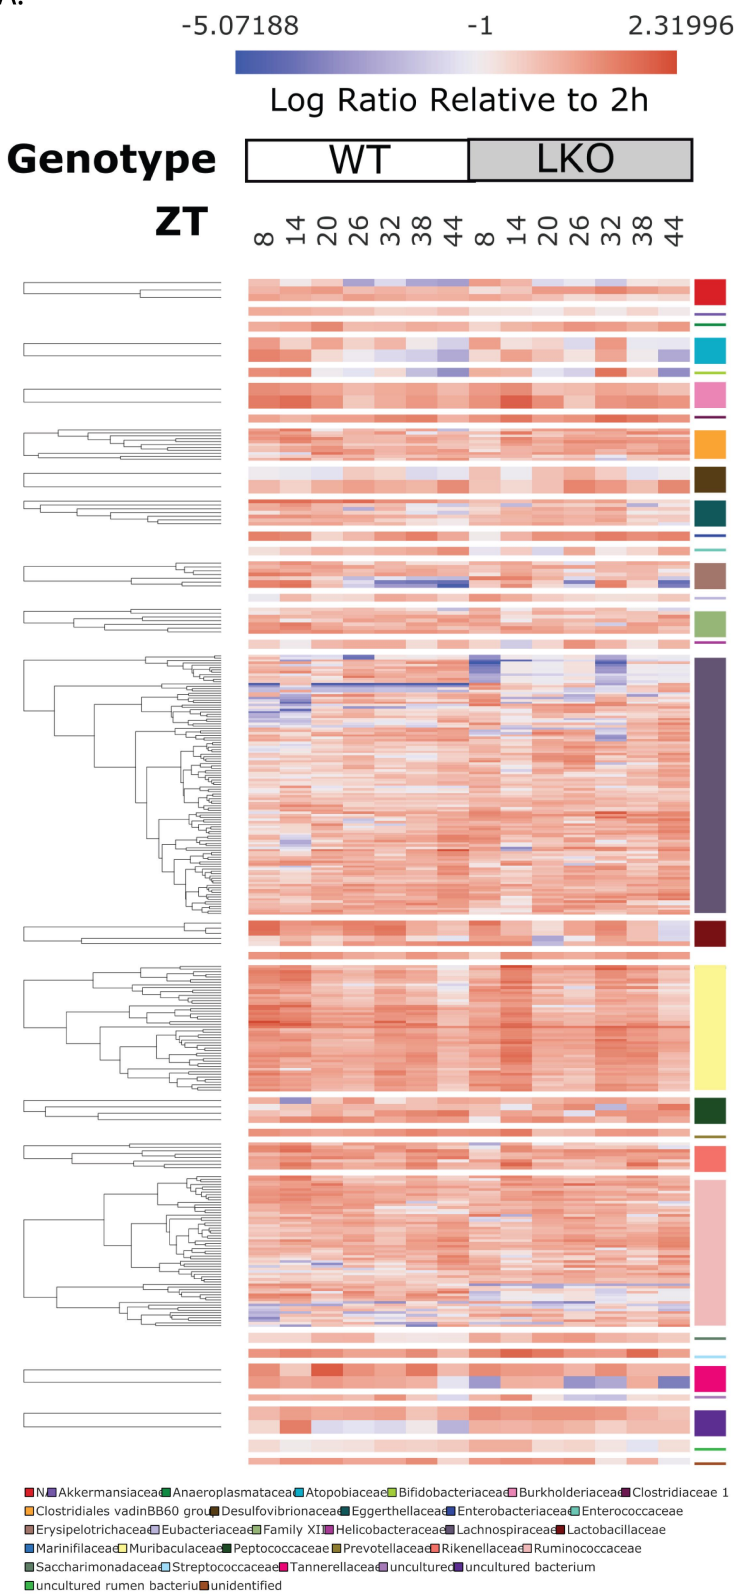

B.

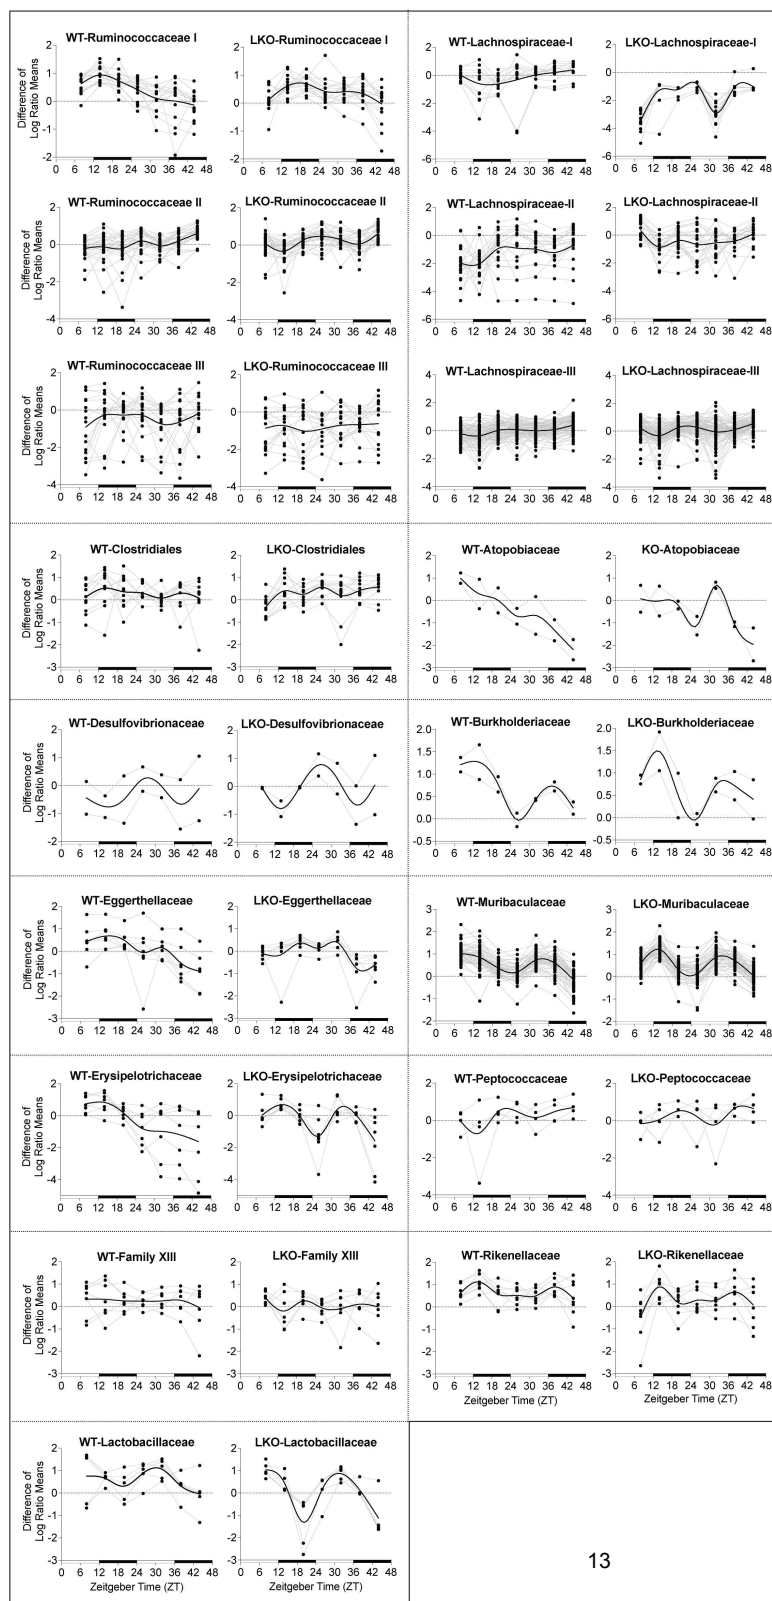

**Supplemental Figure 7, related to Figures 4 and 5. Liver-clock downregulation of metabolic pathways is evident across all timepoints.**

Differential transcriptome analysis of liver samples collected every 4 hrs over 24-hrs from animals maintained in 12:12 LD (ZT2, 6, 10, 14, 18, 22) from SPF and GF, WT and LKO male mice (n=3/timepoint/group). **(A)** Principal Component Analysis of transcriptome profiles, samples divided by collection timepoint. **(B)** Differentially regulated KEGG pathways between WT and LKO, within SPF and GF, divided by ZT collection timepoint. Metabolic pathways are highlighted according to the legend, and non-metabolic pathways are colored gray. **(C)** WT-median-normalized expression of differentially expressed (DE) genes within identified KEGG pathways.

# Supplemental Figure 7

A.

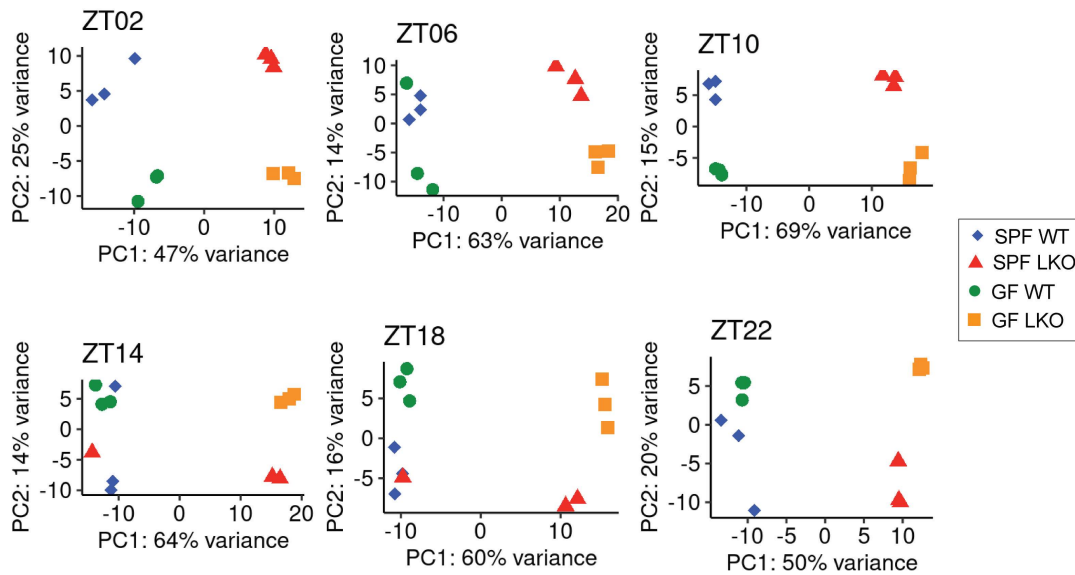

B.

## KEGG Differential Expression

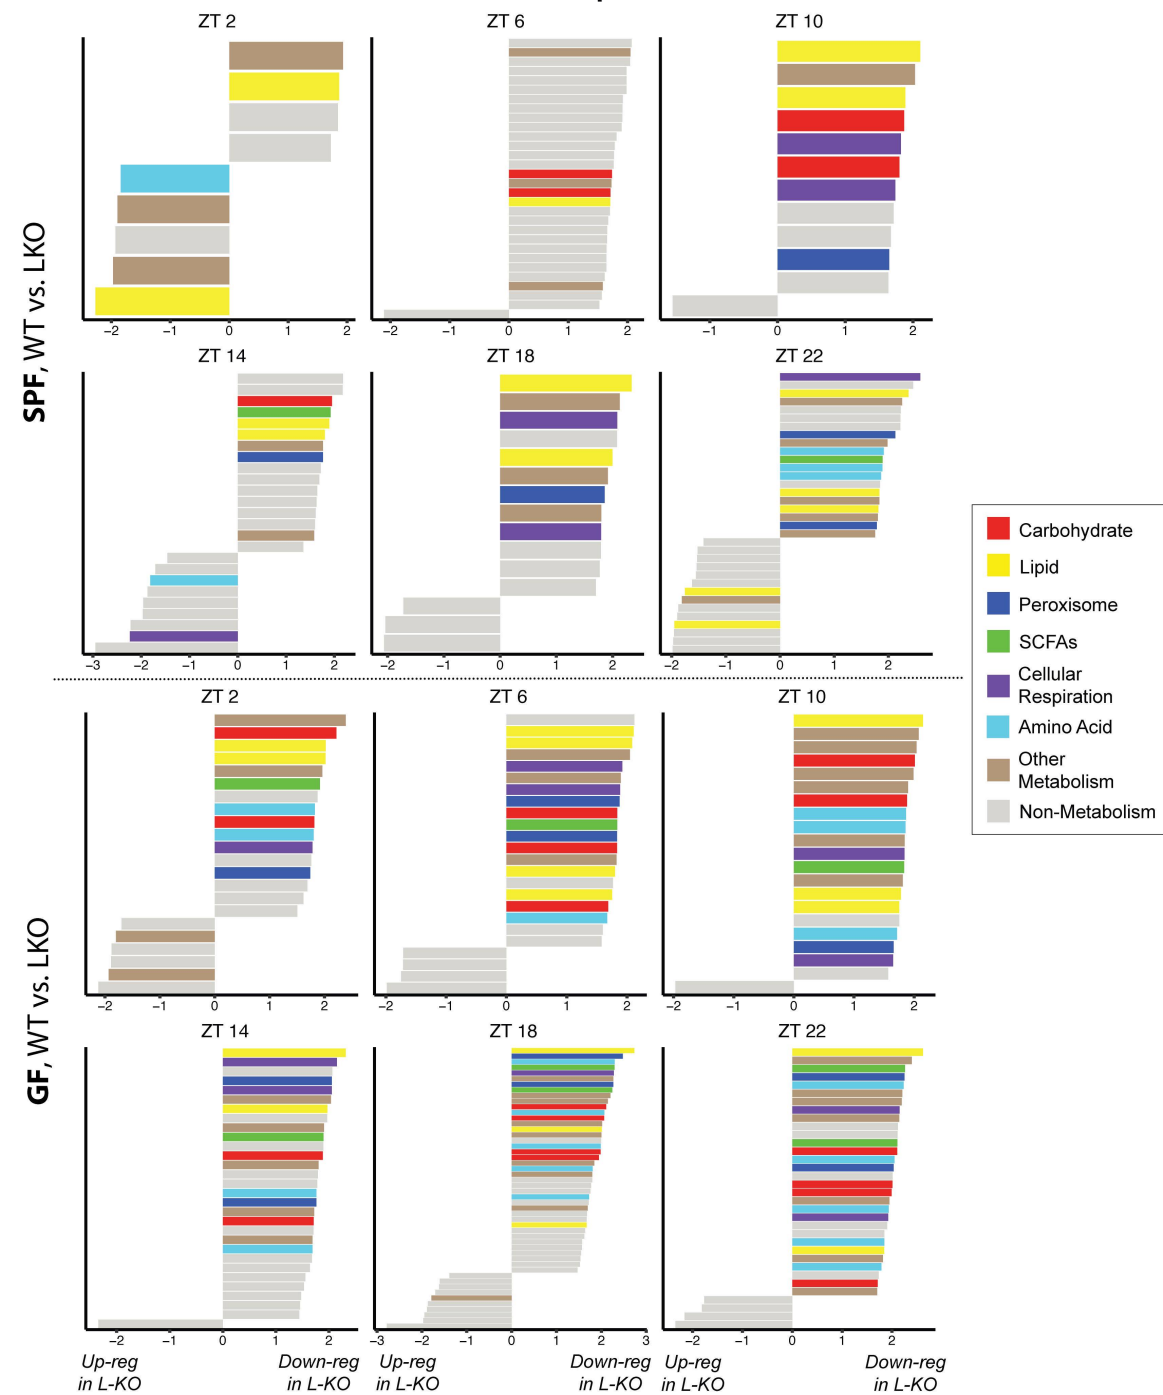

C.

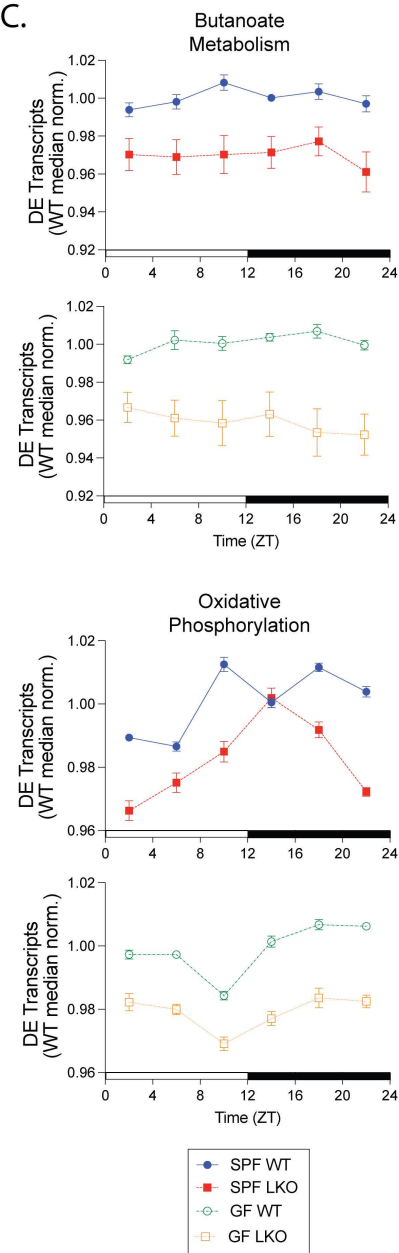

**Supplemental Figure 8, related to Figures 6, 7, and 8. Liver clock drives increases in unique hepatic transcript oscillations and co-occurrence expression in the presence of gut microbes.**

Diurnal and network transcriptome analysis of liver samples collected every 4 hrs over 24-hrs from animals maintained in 12:12 LD (ZT2, 6, 10, 14, 18, 22) from SPF and GF, WT and LKO male mice (n=3/timepoint/group). **(A)** Transcript expression profiles of significantly oscillating SPF WT transcripts; expression values normalized by median, transcripts ordered by time of maximum expression and phase. **(B-E)** Network co-occurrence analysis of correlating transcripts over time within each group ( $p < 0.001$ ). **(B)** Network co-occurrence statistics. **(C-E)** Venn diagrams summarizing correlating transcripts (nodes) and connections (edges) that annotate to carbohydrate **(C)**, lipid **(D)**, and amino acid **(E)** metabolic pathways by KEGG, and crossover within SPF and GF conditions; venn diagram sizes are proportional within each sub-figure.

# Supplemental Figure 8

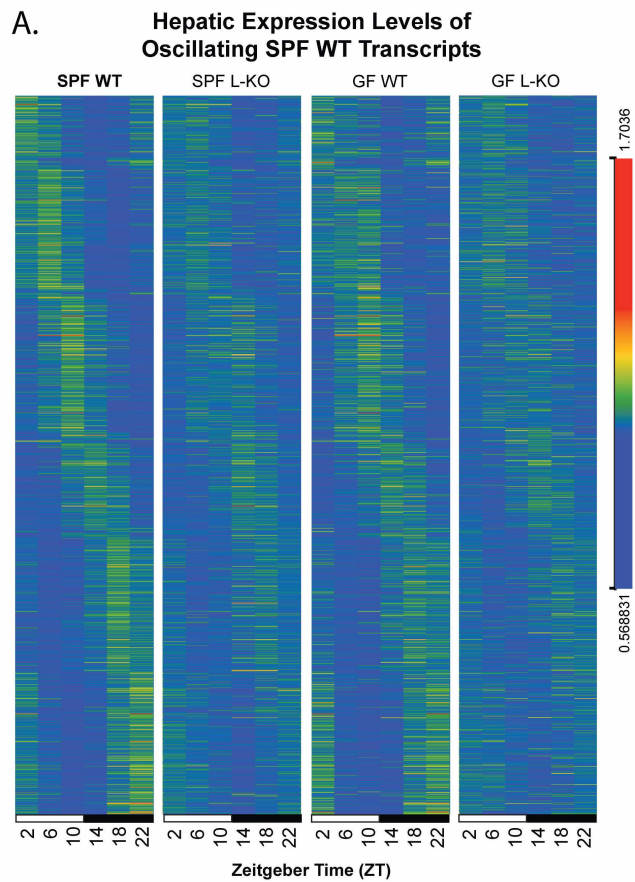

**B.**

|                            | SPF WT | SPF LKO | GF WT | GF LKO |
|----------------------------|--------|---------|-------|--------|
| Number of nodes            | 5603   | 6116    | 4623  | 4482   |
| Number of edges            | 20922  | 36702   | 10638 | 13464  |
| Avg. number of neighbors   | 8.811  | 13.836  | 5.665 | 7.207  |
| Network diameter           | 36     | 33      | 30    | 27     |
| Network radius             | 18     | 17      | 17    | 17     |
| Characteristic path length | 7.072  | 6.587   | 9.787 | 9.073  |
| Clustering coefficient     | 0.225  | 0.25    | 0.218 | 0.248  |
| Network density            | 0.002  | 0.003   | 0.002 | 0.002  |
| Network heterogeneity      | 1.3    | 1.566   | 1.101 | 1.179  |
| Network centralization     | 0.021  | 0.036   | 0.013 | 0.015  |
| Connected components       | 410    | 348     | 462   | 354    |

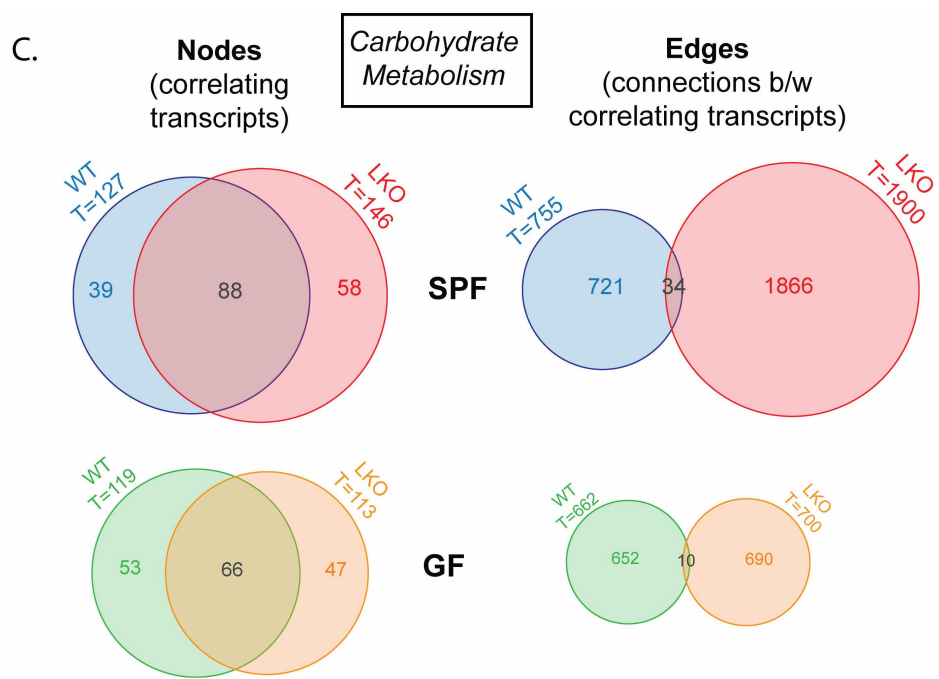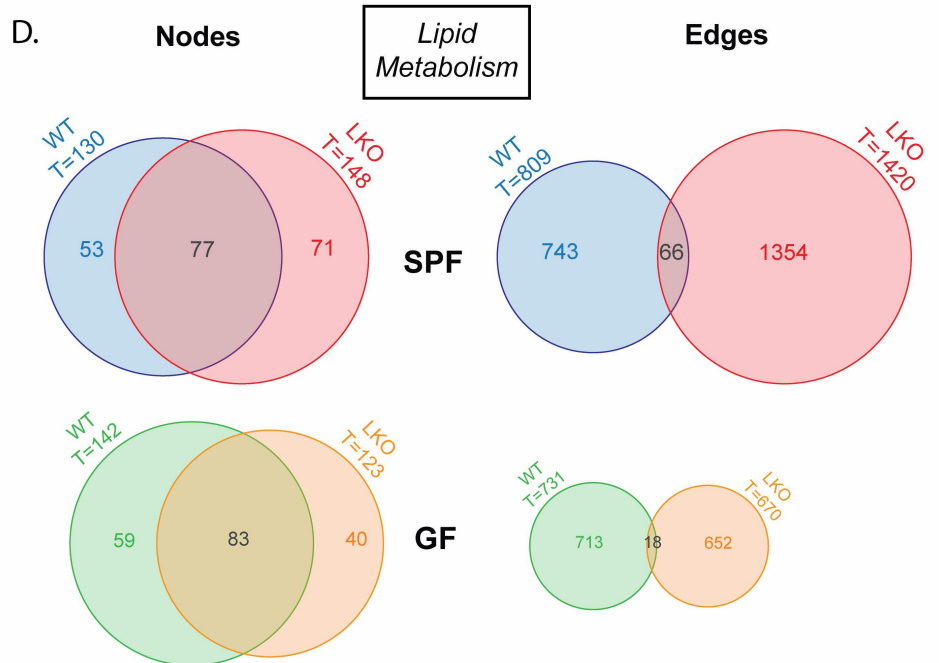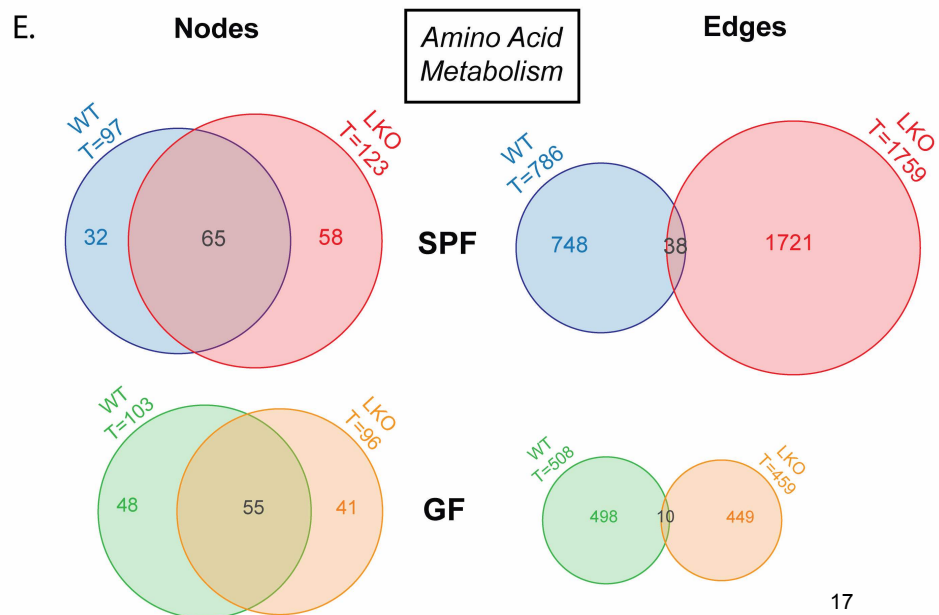

**Supplemental Figure 9, related to Figure 9. Liver clock and gut microbes convey modest changes in food intake patterns and locomotor activity.**

Indirect calorimetry assessment of SPF and GF, WT and LKO male mice, measured over 4 consecutive 12:12 LD cycles (n=12-13). **(A)** Basal metabolic rate represented as kcal/hr. **(B)** Total grams of food intake per LD cycle. **(C)** Food intake summarized as grams consumed per hour; arrows indicate time of feeding onset during the active period. **(D)** Ambulatory motion measured by meters. **(E)** Total ambulatory motion measured by meters per LD cycle. Data points and bars represent mean±SEM, box plots represent median±min/max. Two-tailed unpaired Welch's t tests were performed between 2 groups; \*p<0.05, ns=not significant.

# Supplemental Figure 9

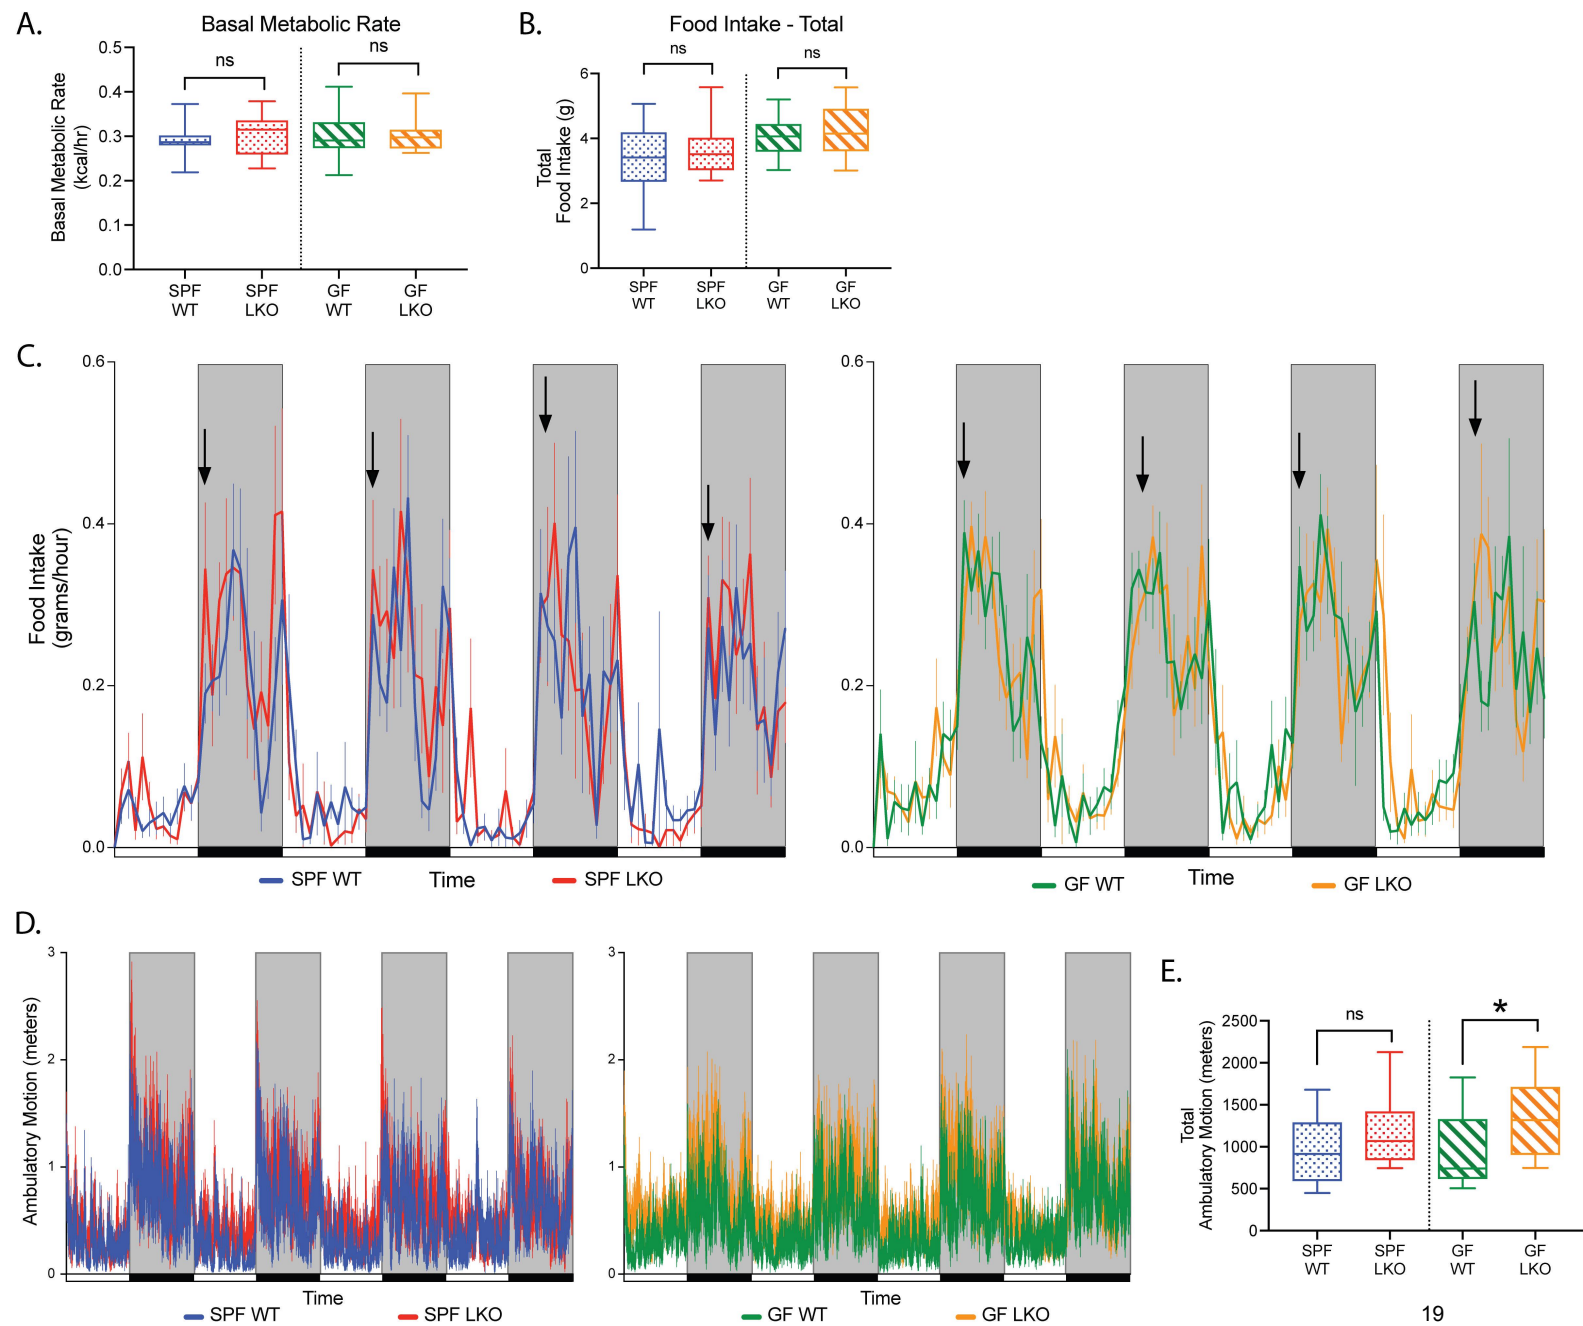

**Supplemental Table 1:** CORUM, GO, KEGG, Reactome, and Wiki pathway enrichment of oscillating hepatic transcripts within SPF and GF, WT and LKO male mice (q-value<0.05 indicated by **X**, analysis via Metascape). **Related to Figure 7.**

|                                                          |                                                                 | SPF |      | GF |      |
|----------------------------------------------------------|-----------------------------------------------------------------|-----|------|----|------|
|                                                          |                                                                 | WT  | L-KO | WT | L-KO |
| <b>Circadian</b>                                         | CORUM_CLOCK-BMAL1-CRY1_COMPLEX                                  | X   |      | X  |      |
|                                                          | CORUM_CLOCK-BMAL1-CRY2_COMPLEX                                  | X   |      | X  |      |
|                                                          | GO_CIRCADIAN_REGULATION_OF_GENE_EXPRESSION                      | X   | X    | X  | X    |
|                                                          | GO_CIRCADIAN_RHYTHM                                             | X   |      | X  |      |
|                                                          | GO_REGULATION_OF_CIRCADIAN_RHYTHM                               | X   |      | X  |      |
|                                                          | GO_RHYTHMIC_PROCESS                                             | X   |      | X  |      |
|                                                          | KEGG_CIRCADIAN_RHYTHM                                           | X   |      | X  |      |
| <b>Insulin</b>                                           | GO_CELLULAR_RESPONSE_TO_INSULIN_STIMULUS                        |     | X    | X  | X    |
|                                                          | GO_INSULIN_RECEPTOR_SIGNALING_PATHWAY                           |     | X    |    | X    |
|                                                          | GO_INSULIN_SECRETION                                            |     |      | X  |      |
|                                                          | GO_NEGATIVE_REGULATION_OF_CELLULAR_RESPONSE_TO_INSULIN_STIMULUS |     |      |    | X    |
|                                                          | GO_NEGATIVE_REGULATION_OF_INSULIN_RECEPTOR_SIGNALING_PATHWAY    |     |      |    | X    |
|                                                          | GO_REGULATION_OF_CELLULAR_RESPONSE_TO_INSULIN_STIMULUS          |     |      |    | X    |
|                                                          | GO_REGULATION_OF_INSULIN_RECEPTOR_SIGNALING_PATHWAY             |     | X    |    | X    |
|                                                          | GO_REGULATION_OF_INSULIN_SECRETION                              |     |      | X  |      |
| GO_RESPONSE_TO_INSULIN                                   |                                                                 | X   | X    | X  |      |
| <b>Glucose/Glycogen/Pyruvate</b>                         | GO_CELLULAR_GLUCOSE_HOMEOSTASIS                                 |     |      | X  | X    |
|                                                          | GO_CELLULAR_RESPONSE_TO_GLUCOSE_STIMULUS                        |     |      | X  |      |
|                                                          | GO_GLUCOSE_HOMEOSTASIS                                          |     | X    | X  | X    |
|                                                          | GO_GLUCOSE_IMPORT                                               |     |      | X  |      |
|                                                          | GO_GLUCOSE_METABOLIC_PROCESS                                    | X   |      | X  | X    |
|                                                          | GO_GLYCOGEN_BIOSYNTHETIC_PROCESS                                | X   |      |    | X    |
|                                                          | GO_GLYCOGEN_METABOLIC_PROCESS                                   | X   |      | X  | X    |
|                                                          | GO_REGULATION_OF_GLUCOSE_METABOLIC_PROCESS                      | X   |      | X  | X    |
|                                                          | GO_RESPONSE_TO_GLUCOSE                                          |     |      | X  | X    |
|                                                          | KEGG_2-OXOCARBOXYLIC_ACID_METABOLISM                            | X   |      | X  |      |
|                                                          | REACTOME_PYRUVATE_METABOLISM                                    | X   |      |    |      |
| REACTOME_PYRUVATE_METABOLISM_AND_CITRIC_ACID_(TCA)_CYCLE | X                                                               |     | X    |    |      |
| <b>5-carbon Sugars</b>                                   | GO_DEOXYRIBOSE_PHOSPHATE_CATABOLIC_PROCESS                      |     |      | X  |      |
|                                                          | GO_DEOXYRIBOSE_PHOSPHATE_METABOLIC_PROCESS                      |     |      | X  |      |
|                                                          | GO_RIBOSE_PHOSPHATE_BIOSYNTHETIC_PROCESS                        |     |      | X  | X    |
|                                                          | GO_RIBOSE_PHOSPHATE_METABOLIC_PROCESS                           |     | X    | X  | X    |
| <b>Carbohydrate Metabolism</b>                           | CORUM_CYTOCHROME_BC1-COMPLEX_MITOCHONDRIAL                      |     | X    |    |      |
|                                                          | GO_CARBOHYDRATE_DERIVATIVE_BIOSYNTHETIC_PROCESS                 | X   |      | X  | X    |
|                                                          | GO_CARBOHYDRATE_DERIVATIVE_CATABOLIC_PROCESS                    |     |      | X  |      |
|                                                          | GO_CARBOHYDRATE_HOMEOSTASIS                                     |     | X    | X  | X    |
|                                                          | GO_CARBOHYDRATE_METABOLIC_PROCESS                               | X   |      | X  | X    |
|                                                          | GO_CARBOHYDRATE_TRANSPORT                                       | X   |      | X  | X    |
|                                                          | GO_CELLULAR_CARBOHYDRATE_METABOLIC_PROCESS                      | X   |      | X  | X    |
|                                                          | GO_CELLULAR_GLUCAN_METABOLIC_PROCESS                            | X   |      | X  | X    |
|                                                          | GO_CELLULAR_POLYSACCHARIDE_METABOLIC_PROCESS                    |     |      | X  |      |
|                                                          | GO_CELLULAR_RESPIRATION                                         |     |      | X  |      |
|                                                          | GO_CELLULAR_RESPONSE_TO_CARBOHYDRATE_STIMULUS                   |     |      | X  | X    |
|                                                          | GO_CELLULAR_RESPONSE_TO_HEXOSE_STIMULUS                         |     |      | X  | X    |
|                                                          | GO_CELLULAR_RESPONSE_TO_MONOSACCHARIDE_STIMULUS                 |     |      | X  | X    |
|                                                          | GO_CELLULAR_RESPONSE_TO_OXIDATIVE_STRESS                        |     |      | X  | X    |
|                                                          | GO_GANGLIOSIDE_METABOLIC_PROCESS                                | X   |      |    |      |
|                                                          | GO_GLUCAN_BIOSYNTHETIC_PROCESS                                  | X   |      |    | X    |
|                                                          | GO_GLUCAN_METABOLIC_PROCESS                                     | X   |      | X  | X    |
|                                                          | GO_GLYCOSYL_COMPOUND_BIOSYNTHETIC_PROCESS                       |     |      | X  | X    |
|                                                          | GO_GLYCOSYL_COMPOUND_CATABOLIC_PROCESS                          |     |      | X  |      |
|                                                          | GO_GLYCOSYL_COMPOUND_METABOLIC_PROCESS                          | X   |      | X  | X    |
|                                                          | GO_MONOCARBOXYLIC_ACID_BIOSYNTHETIC_PROCESS                     | X   |      | X  | X    |
|                                                          | GO_MONOSACCHARIDE_BIOSYNTHETIC_PROCESS                          |     |      | X  |      |
|                                                          | GO_MONOSACCHARIDE_METABOLIC_PROCESS                             | X   | X    | X  | X    |
|                                                          | GO_MONOSACCHARIDE_TRANSMEMBRANE_TRANSPORT                       |     |      |    | X    |
|                                                          | GO_REGULATION_OF_CARBOHYDRATE_METABOLIC_PROCESS                 |     |      | X  |      |
|                                                          | GO_REGULATION_OF_CELLULAR_CARBOHYDRATE_METABOLIC_PROCESS        |     |      | X  |      |
|                                                          | GO_RESPONSE_TO_CARBOHYDRATE                                     |     |      | X  | X    |
|                                                          | GO_RESPONSE_TO_MONOSACCHARIDE                                   |     |      | X  | X    |
|                                                          | GO_TRICARBOXYLIC_ACID_CYCLE                                     |     |      | X  |      |
|                                                          | GO_TRICARBOXYLIC_ACID_METABOLIC_PROCESS                         |     |      | X  |      |
|                                                          | KEGG_CARBON_METABOLISM                                          | X   |      | X  |      |
|                                                          | KEGG_GLYOXYLATE_AND_DICARBOXYLATE_METABOLISM                    | X   |      | X  |      |
|                                                          | KEGG_OXIDATIVE_PHOSPHORYLATION                                  |     | X    |    |      |
|                                                          | REACTOME_METABOLISM_OF_CARBOHYDRATES                            |     |      | X  |      |
|                                                          | WIKI_ELECTRON_TRANSPORT_CHAIN                                   |     | X    |    |      |



|                                                                               |                                                                           |   |   |   |   |
|-------------------------------------------------------------------------------|---------------------------------------------------------------------------|---|---|---|---|
|                                                                               | WIKI GLUTATHIONE AND ONE CARBON METABOLISM                                | X |   | X |   |
|                                                                               | WIKI ONE CARBON METABOLISM                                                | X |   | X |   |
|                                                                               | WIKI ONE CARBON METABOLISM AND RELATED PATHWAYS                           | X |   | X |   |
| Fatty Acids                                                                   | GO_CELLULAR_KETONE_METABOLIC_PROCESS                                      | X |   | X | X |
|                                                                               | GO_FATTY_ACID_BETA-OXIDATION                                              | X |   | X | X |
|                                                                               | GO_FATTY_ACID_BIOSYNTHETIC_PROCESS                                        | X |   | X |   |
|                                                                               | GO_FATTY_ACID_CATABOLIC_PROCESS                                           | X |   | X | X |
|                                                                               | GO_FATTY_ACID_METABOLIC_PROCESS                                           | X |   | X | X |
|                                                                               | GO_FATTY_ACID_OXIDATION                                                   | X |   | X | X |
|                                                                               | GO_LONG-CHAIN_FATTY_ACID_METABOLIC_PROCESS                                |   |   | X |   |
|                                                                               | GO_METHYL-BRANCHED_FATTY_ACID_METABOLIC_PROCESS                           |   |   | X |   |
|                                                                               | GO_NEGATIVE_REGULATION_OF_FATTY_ACID_METABOLIC_PROCESS                    | X |   |   | X |
|                                                                               | GO_REGULATION_OF_CELLULAR_KETONE_METABOLIC_PROCESS                        | X |   | X | X |
|                                                                               | GO_REGULATION_OF_FATTY_ACID_BETA-OXIDATION                                |   |   | X | X |
|                                                                               | GO_REGULATION_OF_FATTY_ACID_METABOLIC_PROCESS                             | X |   | X | X |
|                                                                               | GO_REGULATION_OF_FATTY_ACID_OXIDATION                                     | X |   | X | X |
|                                                                               | GO_VERY_LONG-CHAIN_FATTY_ACID_METABOLIC_PROCESS                           |   |   | X |   |
|                                                                               | KEGG_BIOSYNTHESIS_OF_UNSATURATED_FATTY_ACIDS                              | X |   |   |   |
|                                                                               | KEGG_FATTY_ACID_DEGRADATION                                               |   |   | X |   |
|                                                                               | REACTOME_FATTY_ACID_METABOLISM                                            | X |   | X |   |
|                                                                               | REACTOME_ALPHA-LINOLEIC_ACID_(ALA)_METABOLISM                             | X |   |   |   |
|                                                                               | REACTOME_ALPHA-LINOLEIC_(OMEGA3)_AND_LINOLEIC_(OMEGA6)_ACID_METABOLISM    | X |   |   |   |
|                                                                               | REACTOME_LINOLEIC_ACID_(LA)_METABOLISM                                    | X |   |   |   |
| WIKI_FATTY_ACID_BIOSYNTHESIS                                                  |                                                                           |   | X |   |   |
| Cholesterol                                                                   | GO_CHOLESTEROL_BIOSYNTHETIC_PROCESS                                       |   |   | X |   |
|                                                                               | GO_CHOLESTEROL_HOMEOSTASIS                                                | X |   | X | X |
|                                                                               | GO_CHOLESTEROL_METABOLIC_PROCESS                                          |   |   | X |   |
|                                                                               | GO_POSITIVE_REGULATION_OF_CHOLESTEROL_METABOLIC_PROCESS                   | X |   | X |   |
|                                                                               | GO_REGULATION_OF_CHOLESTEROL_METABOLIC_PROCESS                            |   |   | X |   |
|                                                                               | REACTOME_CHOLESTEROL_BIOSYNTHESIS                                         |   | X | X |   |
|                                                                               | REACTOME_CHOLESTEROL_BIOSYNTHESIS_VIA_DESMOSTEROL                         |   |   | X |   |
|                                                                               | REACTOME_CHOLESTEROL_BIOSYNTHESIS_VIA_LATHOSTEROL                         |   |   | X |   |
| WIKI_CHOLESTEROL_BIOSYNTHESIS                                                 |                                                                           | X | X |   |   |
| Bile Acids                                                                    | GO_BILE_ACID_BIOSYNTHETIC_PROCESS                                         |   |   | X |   |
|                                                                               | GO_BILE_ACID_METABOLIC_PROCESS                                            | X |   | X | X |
|                                                                               | KEGG_BILE_SECRETION                                                       | X |   | X | X |
|                                                                               | KEGG_PRIMARY_BILE_ACID_BIOSYNTHESIS                                       |   |   | X |   |
|                                                                               | REACTOME_BILE_ACID_AND_BILE_SALT_METABOLISM                               |   |   | X |   |
|                                                                               | REACTOME_SYNTHESIS_OF_BILE_ACIDS_AND_BILE_SALTS                           |   |   | X |   |
|                                                                               | REACTOME_SYNTHESIS_OF_BILE_ACIDS_AND_BILE_SALTS_VIA_24-HYDROXYCHOLESTEROL |   |   | X |   |
| REACTOME_SYNTHESIS_OF_BILE_ACIDS_AND_BILE_SALTS_VIA_7ALPHA-HYDROXYCHOLESTEROL |                                                                           |   | X |   |   |
| Peroxisome                                                                    | GO_ESTABLISHMENT_OF_PROTEIN_LOCALIZATION_TO_PEROXISOME                    |   |   |   | X |
|                                                                               | GO_PEROXISOMAL_TRANSPORT                                                  |   |   |   | X |
|                                                                               | GO_PEROXISOME_ORGANIZATION                                                |   |   | X |   |
|                                                                               | GO_PROTEIN_LOCALIZATION_TO_PEROXISOME                                     |   |   |   | X |
|                                                                               | GO_PROTEIN_TARGETING_TO_PEROXISOME                                        |   |   |   | X |
|                                                                               | KEGG_PEROXISOME                                                           | X | X | X | X |
|                                                                               | KEGG_PPAR_SIGNALING_PATHWAY                                               | X |   | X | X |
|                                                                               | REACTOME_PEROXISOMAL_LIPID_METABOLISM                                     |   |   | X | X |
|                                                                               | REACTOME_PEROXISOMAL_PROTEIN_IMPORT                                       |   |   | X | X |
| WIKI_PPAR_SIGNALING_PATHWAY                                                   | X                                                                         |   | X |   |   |
| Lipid Metabolism                                                              | GO_GLYCEROLIPID_METABOLIC_PROCESS                                         |   | X | X | X |
|                                                                               | GO_ACYLGLYCEROL_BIOSYNTHETIC_PROCESS                                      |   |   | X | X |
|                                                                               | GO_ACYLGLYCEROL_METABOLIC_PROCESS                                         |   |   | X | X |
|                                                                               | GO_CANALICULAR_BILE_ACID_TRANSPORT                                        |   |   |   | X |
|                                                                               | GO_CELLULAR_LIPID_CATABOLIC_PROCESS                                       | X |   | X | X |
|                                                                               | GO_CELLULAR_RESPONSE_TO_STEROID_HORMONE_STIMULUS                          |   |   |   | X |
|                                                                               | GO_CELLULAR_RESPONSE_TO_STEROL                                            |   |   | X | X |
|                                                                               | GO_DITERPENOID_METABOLIC_PROCESS                                          |   |   | X |   |
|                                                                               | GO_FATTY-ACYL-COA_METABOLIC_PROCESS                                       |   |   | X | X |
|                                                                               | GO_GLYCEROLIPID_BIOSYNTHETIC_PROCESS                                      |   | X | X | X |
|                                                                               | GO_GLYCEROPHOSPHOLIPID_BIOSYNTHETIC_PROCESS                               |   |   |   | X |
|                                                                               | GO_GLYCEROPHOSPHOLIPID_METABOLIC_PROCESS                                  |   |   |   | X |
|                                                                               | GO_GLYCOPHINGOLIPID_METABOLIC_PROCESS                                     | X |   |   |   |
|                                                                               | GO_ISOPRENOID_METABOLIC_PROCESS                                           |   |   | X |   |
|                                                                               | GO_LIPID_BIOSYNTHETIC_PROCESS                                             | X | X | X | X |
|                                                                               | GO_LIPID_CATABOLIC_PROCESS                                                | X |   | X | X |
|                                                                               | GO_LIPID_DROPLET_ORGANIZATION                                             | X |   | X |   |
|                                                                               | GO_LIPID_HOMEOSTASIS                                                      |   |   | X | X |
|                                                                               | GO_LIPID_LOCALIZATION                                                     | X |   | X | X |
|                                                                               | GO_LIPID_MODIFICATION                                                     | X |   | X | X |

|                                                                             |   |   |   |   |
|-----------------------------------------------------------------------------|---|---|---|---|
| GO_LIPID_OXIDATION                                                          | X |   | X | X |
| GO_LIPID_PHOSPHORYLATION                                                    |   |   |   | X |
| GO_LIPID_STORAGE                                                            | X |   | X |   |
| GO_LIPID_TRANSPORT                                                          | X |   | X | X |
| GO_LIPOPROTEIN_METABOLIC_PROCESS                                            |   |   |   | X |
| GO_LONG-CHAIN_FATTY-ACYL-COA_METABOLIC_PROCESS                              |   |   | X | X |
| GO_MEMBRANE_LIPID_METABOLIC_PROCESS                                         |   |   | X |   |
| GO_NEGATIVE_REGULATION_OF_GLUCOCORTICOID_RECEPTOR_SIGNALING_PATHWAY         | X |   | X |   |
| GO_NEGATIVE_REGULATION_OF_LIPID_LOCALIZATION                                | X |   | X |   |
| GO_NEUTRAL_LIPID_BIOSYNTHETIC_PROCESS                                       |   |   | X | X |
| GO_NEUTRAL_LIPID_CATABOLIC_PROCESS                                          |   |   | X |   |
| GO_NEUTRAL_LIPID_METABOLIC_PROCESS                                          |   |   | X | X |
| GO_PHOSPHATIDIC_ACID_METABOLIC_PROCESS                                      |   |   |   | X |
| GO_PHOSPHATIDYLCHOLINE_BIOSYNTHETIC_PROCESS                                 |   |   | X |   |
| GO_PHOSPHOLIPID_BIOSYNTHETIC_PROCESS                                        |   | X | X | X |
| GO_PHOSPHOLIPID_METABOLIC_PROCESS                                           |   | X | X | X |
| GO_POSITIVE_REGULATION_OF_LIPID_BIOSYNTHETIC_PROCESS                        | X | X | X | X |
| GO_POSITIVE_REGULATION_OF_LIPID_METABOLIC_PROCESS                           | X |   | X | X |
| GO_POSITIVE_REGULATION_OF_STEROID_METABOLIC_PROCESS                         | X |   |   |   |
| GO_POSITIVE_REGULATION_OF_TRIGLYCERIDE_BIOSYNTHETIC_PROCESS                 |   |   | X | X |
| GO_POSITIVE_REGULATION_OF_TRIGLYCERIDE_METABOLIC_PROCESS                    |   |   | X | X |
| GO_REGULATION_OF_LIPID_BIOSYNTHETIC_PROCESS                                 | X | X | X | X |
| GO_REGULATION_OF_LIPID_CATABOLIC_PROCESS                                    |   |   | X | X |
| GO_REGULATION_OF_LIPID_LOCALIZATION                                         | X |   | X |   |
| GO_REGULATION_OF_LIPID_METABOLIC_PROCESS                                    | X | X | X | X |
| GO_REGULATION_OF_LIPID_TRANSPORT                                            |   |   | X |   |
| GO_REGULATION_OF_PHOSPHOLIPID_METABOLIC_PROCESS                             |   |   |   | X |
| GO_REGULATION_OF_STEROID_METABOLIC_PROCESS                                  |   | X | X |   |
| GO_REGULATION_OF_TRIGLYCERIDE_BIOSYNTHETIC_PROCESS                          |   |   | X | X |
| GO_REGULATION_OF_TRIGLYCERIDE_METABOLIC_PROCESS                             |   |   | X | X |
| GO_RESPONSE_TO_STEROID_HORMONE                                              |   |   |   | X |
| GO_RESPONSE_TO_STEROL                                                       |   |   | X |   |
| GO_SPHINGOLIPID_CATABOLIC_PROCESS                                           | X |   |   |   |
| GO_SPHINGOLIPID_METABOLIC_PROCESS                                           | X |   | X |   |
| GO_STEROID_BIOSYNTHETIC_PROCESS                                             |   | X | X |   |
| GO_STEROID_METABOLIC_PROCESS                                                | X | X | X | X |
| GO_STEROL_BIOSYNTHETIC_PROCESS                                              |   |   | X |   |
| GO_STEROL_HOMEOSTASIS                                                       | X |   | X | X |
| GO_STEROL_METABOLIC_PROCESS                                                 |   |   | X |   |
| GO_TERPENOID_METABOLIC_PROCESS                                              |   |   | X |   |
| GO_TRIGLYCERIDE_BIOSYNTHETIC_PROCESS                                        |   |   | X | X |
| GO_TRIGLYCERIDE_METABOLIC_PROCESS                                           |   |   | X | X |
| KEGG_GLYCEROLIPID_METABOLISM                                                |   |   | X | X |
| KEGG_GLYCEROPHOSPHOLIPID_METABOLISM                                         |   |   | X | X |
| KEGG_PHOSPHATIDYLINOSITOL_SIGNALING_SYSTEM                                  |   |   |   | X |
| KEGG_STEROID_BIOSYNTHESIS                                                   |   |   | X |   |
| KEGG_TERPENOID_BACKBONE_BIOSYNTHESIS                                        |   |   | X |   |
| KEGG_TRIACYLGLYCEROL_BIOSYNTHESIS                                           |   |   | X | X |
| REACTOME_FATTY_ACYL-COA_BIOSYNTHESIS                                        |   |   | X |   |
| REACTOME_GLYCEROPHOSPHOLIPID_BIOSYNTHESIS                                   |   |   | X | X |
| REACTOME_METABOLISM_OF_LIPIDS                                               | X | X | X | X |
| REACTOME_METABOLISM_OF_STEROIDS                                             |   |   | X |   |
| REACTOME_PHOSPHOLIPID_METABOLISM                                            |   |   | X | X |
| REACTOME_SYNTHESIS_OF_VERY_LONG-CHAIN_FATTY_ACYL-COAS                       | X |   | X |   |
| GO_CELLULAR_PROTEIN_CATABOLIC_PROCESS                                       | X | X | X | X |
| GO_GLYCOPROTEIN_BIOSYNTHETIC_PROCESS                                        |   |   |   | X |
| GO_GLYCOPROTEIN_METABOLIC_PROCESS                                           |   |   |   | X |
| GO_LIPOPROTEIN_METABOLIC_PROCESS                                            |   |   |   | X |
| GO_MODIFICATION-DEPENDENT_PROTEIN_CATABOLIC_PROCESS                         |   | X | X | X |
| GO_POSITIVE_REGULATION_OF_CELLULAR_PROTEIN_CATABOLIC_PROCESS                |   |   |   | X |
| GO_POSITIVE_REGULATION_OF_PROTEIN_CATABOLIC_PROCESS                         |   |   |   | X |
| GO_PROTEASOMAL_PROTEIN_CATABOLIC_PROCESS                                    |   | X | X | X |
| GO_PROTEASOME-MEDIATED_UBIQUITIN-DEPENDENT_PROTEIN_CATABOLIC_PROCESS        |   | X | X | X |
| GO_PROTEOLYSIS_INVOLVED_IN_CELLULAR_PROTEIN_CATABOLIC_PROCESS               | X | X | X | X |
| GO_REGULATION_OF_CELLULAR_PROTEIN_CATABOLIC_PROCESS                         |   |   |   | X |
| GO_REGULATION_OF_LIPOPROTEIN_PARTICLE_CLEARANCE                             |   |   | X |   |
| GO_REGULATION_OF_PROTEASOMAL_PROTEIN_CATABOLIC_PROCESS                      |   |   |   | X |
| GO_REGULATION_OF_PROTEASOMAL_UBIQUITIN-DEPENDENT_PROTEIN_CATABOLIC_PROCESS  |   |   |   | X |
| GO_REGULATION_OF_PROTEIN_CATABOLIC_PROCESS                                  |   |   | X | X |
| GO_REGULATION_OF_PROTEOLYSIS_INVOLVED_IN_CELLULAR_PROTEIN_CATABOLIC_PROCESS |   |   |   | X |
| GO_SCF-DEPENDENT_PROTEASOMAL_UBIQUITIN-DEPENDENT_PROTEIN_CATABOLIC_PROCESS  |   |   |   | X |

Proteins

|                                                                                   |             |                                                                            |   |   |   |   |
|-----------------------------------------------------------------------------------|-------------|----------------------------------------------------------------------------|---|---|---|---|
| Protein Metabolism                                                                | Peptides AA | GO_UBIQUITIN-DEPENDENT_PROTEIN_CATABOLIC_PROCESS                           |   |   | X | X |
|                                                                                   |             | GO_ALPHA-AMINO_ACID_BIOSYNTHETIC_PROCESS                                   |   |   | X |   |
|                                                                                   |             | GO_ALPHA-AMINO_ACID_CATABOLIC_PROCESS                                      | X |   | X |   |
|                                                                                   |             | GO_ALPHA-AMINO_ACID_METABOLIC_PROCESS                                      | X | X | X | X |
|                                                                                   |             | GO_AMINO_ACID_ACTIVATION                                                   |   |   |   | X |
|                                                                                   |             | GO_AROMATIC_AMINO_ACID_FAMILY_CATABOLIC_PROCESS                            | X |   | X |   |
|                                                                                   |             | GO_ASPARTATE_FAMILY_AMINO_ACID_BIOSYNTHETIC_PROCESS                        |   |   | X |   |
|                                                                                   |             | GO_ASPARTATE_FAMILY_AMINO_ACID_CATABOLIC_PROCESS                           |   |   | X |   |
|                                                                                   |             | GO_ASPARTATE_FAMILY_AMINO_ACID_METABOLIC_PROCESS                           | X |   | X |   |
|                                                                                   |             | GO_CELLULAR_AMINO_ACID_BIOSYNTHETIC_PROCESS                                |   |   | X |   |
|                                                                                   |             | GO_CELLULAR_AMINO_ACID_CATABOLIC_PROCESS                                   | X |   | X |   |
|                                                                                   |             | GO_CELLULAR_AMINO_ACID_METABOLIC_PROCESS                                   | X | X | X | X |
|                                                                                   |             | GO_CELLULAR_MODIFIED_AMINO_ACID_METABOLIC_PROCESS                          | X |   | X |   |
|                                                                                   |             | GO_CELLULAR_RESPONSE_TO_AMINO_ACID_STARVATION                              |   |   |   | X |
|                                                                                   |             | GO_CELLULAR_RESPONSE_TO_PEPTIDE                                            |   | X | X | X |
|                                                                                   |             | GO_CELLULAR_RESPONSE_TO_PEPTIDE_HORMONE_STIMULUS                           |   | X | X | X |
|                                                                                   |             | GO_CYSSTEINE_CATABOLIC_PROCESS                                             |   |   | X |   |
|                                                                                   |             | GO_CYSSTEINE_METABOLIC_PROCESS                                             |   |   | X |   |
|                                                                                   |             | GO_GLUTAMINE_FAMILY_AMINO_ACID_METABOLIC_PROCESS                           | X |   |   |   |
|                                                                                   |             | GO_GLUTAMINE_METABOLIC_PROCESS                                             |   |   |   | X |
|                                                                                   |             | GO_GLYCINE_METABOLIC_PROCESS                                               |   |   | X |   |
|                                                                                   |             | GO_L-CYSSTEINE_CATABOLIC_PROCESS                                           |   |   | X |   |
|                                                                                   |             | GO_L-CYSSTEINE_METABOLIC_PROCESS                                           |   |   | X |   |
|                                                                                   |             | GO_METHIONINE_BIOSYNTHETIC_PROCESS                                         | X |   |   |   |
|                                                                                   |             | GO_METHIONINE_METABOLIC_PROCESS                                            | X |   | X |   |
|                                                                                   |             | GO_NEGATIVE_REGULATION_OF_PROTEIN_SERINE/THREONINE_KINASE_ACTIVITY         |   |   |   | X |
|                                                                                   |             | GO_ORNITHINE_METABOLIC_PROCESS                                             |   | X |   |   |
|                                                                                   |             | GO_PEPTIDE_BIOSYNTHETIC_PROCESS                                            |   | X | X | X |
|                                                                                   |             | GO_PEPTIDE_HORMONE_SECRETION                                               |   |   | X |   |
|                                                                                   |             | GO_PEPTIDE_SECRETION                                                       |   |   | X |   |
|                                                                                   |             | GO_PEPTIDYL-ASPARAGINE_MODIFICATION                                        |   |   |   | X |
|                                                                                   |             | GO_PROTEIN_N-LINKED_GLYCOSYLATION_VIA_ASPARAGINE                           |   |   |   | X |
|                                                                                   |             | GO_REGULATION_OF_CYCLIN-DEPENDENT_PROTEIN_SERINE/THREONINE_KINASE_ACTIVITY |   |   | X |   |
|                                                                                   |             | GO_REGULATION_OF_PEPTIDE_HORMONE_SECRETION                                 |   |   | X |   |
|                                                                                   |             | GO_REGULATION_OF_PEPTIDE_TRANSPORT                                         |   | X | X | X |
|                                                                                   |             | GO_RESPONSE_TO_AMINO_ACID_STARVATION                                       |   |   | X | X |
|                                                                                   |             | GO_RESPONSE_TO_PEPTIDE                                                     |   | X | X | X |
|                                                                                   |             | GO_RESPONSE_TO_PEPTIDE_HORMONE                                             |   | X | X | X |
|                                                                                   |             | GO_S-ADENOSYLHOMOCYSTEINE_METABOLIC_PROCESS                                |   |   | X |   |
|                                                                                   |             | GO_S-ADENOSYLMETHIONINE_METABOLIC_PROCESS                                  |   |   | X |   |
|                                                                                   |             | GO_SERINE_FAMILY_AMINO_ACID_CATABOLIC_PROCESS                              |   |   | X |   |
|                                                                                   |             | GO_SERINE_FAMILY_AMINO_ACID_METABOLIC_PROCESS                              | X |   | X |   |
| GO_SULFUR_AMINO_ACID_BIOSYNTHETIC_PROCESS                                         | X           |                                                                            |   |   |   |   |
| GO_SULFUR_AMINO_ACID_CATABOLIC_PROCESS                                            |             |                                                                            | X |   |   |   |
| GO_SULFUR_AMINO_ACID_METABOLIC_PROCESS                                            | X           |                                                                            | X |   |   |   |
| GO_TAURINE_METABOLIC_PROCESS                                                      |             |                                                                            | X |   |   |   |
| GO_TRANSMEMBRANE_RECEPTOR_PROTEIN_TYROSINE_KINASE_SIGNALING_PATHWAY               |             |                                                                            |   | X |   |   |
| KEGG_ARGININE_BIOSYNTHESIS                                                        | X           |                                                                            | X |   |   |   |
| KEGG_BIOSYNTHESIS_OF_AMINO_ACIDS                                                  | X           |                                                                            | X |   |   |   |
| KEGG_CYSSTEINE_AND_METHIONINE_METABOLISM                                          | X           |                                                                            | X |   |   |   |
| KEGG_GLYCINE_SERINE_AND_THREONINE_METABOLISM                                      |             |                                                                            | X |   |   |   |
| KEGG_LYSINE_DEGRADATION                                                           |             |                                                                            | X |   |   |   |
| KEGG_LYSINE_DEGRADATION_LYSINE=>_SACCHAROPINE=>_ACETOACETYL-COA                   |             |                                                                            | X |   |   |   |
| KEGG_METHIONINE_DEGRADATION                                                       |             |                                                                            | X |   |   |   |
| KEGG_TRYPTOPHAN_METABOLISM                                                        |             |                                                                            | X |   |   |   |
| REACTOME_ASPARAGINE_N-LINKED_GLYCOSYLATION                                        | X           | X                                                                          | X | X |   |   |
| REACTOME_GLYOXYLATE_METABOLISM_AND_GLYCINE_DEGRADATION                            | X           |                                                                            |   |   |   |   |
| REACTOME_METABOLISM_OF_AMINO_ACIDS_AND_DERIVATIVES                                | X           | X                                                                          | X | X |   |   |
| REACTOME_OXYGEN-DEPENDENT_PROLINE_HYDROXYLATION_OF_HYPOXIA-INDUCIBLE_FACTOR_ALPHA |             |                                                                            | X |   |   |   |
| REACTOME_SULFUR_AMINO_ACID_METABOLISM                                             |             |                                                                            | X | X |   |   |
| WIKI_TRYPTOPHAN_METABOLISM                                                        |             |                                                                            | X |   |   |   |
| GO_2'-DEOXYRIBONUCLEOTIDE_METABOLIC_PROCESS                                       |             |                                                                            | X |   |   |   |
| GO_DEOXYRIBONUCLEOSIDE_MONOPHOSPHATE_METABOLIC_PROCESS                            | X           |                                                                            |   |   |   |   |
| GO_DEOXYRIBONUCLEOTIDE_METABOLIC_PROCESS                                          |             |                                                                            | X |   |   |   |
| GO_DNA_BIOSYNTHETIC_PROCESS                                                       |             | X                                                                          |   |   |   |   |
| GO_MRNA_CATABOLIC_PROCESS                                                         |             |                                                                            |   | X |   |   |
| GO_MRNA_METABOLIC_PROCESS                                                         |             |                                                                            |   | X |   |   |
| GO_NCRNA_METABOLIC_PROCESS                                                        |             |                                                                            | X | X |   |   |

Nucleotide Metabolism

|                                                              |   |   |   |   |
|--------------------------------------------------------------|---|---|---|---|
| GO_NICOTINAMIDE_NUCLEOTIDE_BIOSYNTHETIC_PROCESS              |   |   |   | X |
| GO_NICOTINAMIDE_NUCLEOTIDE_METABOLIC_PROCESS                 |   |   | X | X |
| GO_NUCLEAR-TRANSCRIBED_MRNA_CATABOLIC_PROCESS                |   |   |   | X |
| GO_NUCLEOBASE-CONTAINING_COMPOUND_CATABOLIC_PROCESS          |   |   | X | X |
| GO_NUCLEOBASE-CONTAINING_SMALL_MOLECULE_BIOSYNTHETIC_PROCESS |   |   | X | X |
| GO_NUCLEOBASE-CONTAINING_SMALL_MOLECULE_METABOLIC_PROCESS    | X | X | X | X |
| GO_NUCLEOSIDE_BIOSYNTHETIC_PROCESS                           |   |   | X |   |
| GO_NUCLEOSIDE_BISPHOSPHATE_BIOSYNTHETIC_PROCESS              |   |   | X | X |
| GO_NUCLEOSIDE_BISPHOSPHATE_METABOLIC_PROCESS                 | X | X | X | X |
| GO_NUCLEOSIDE_METABOLIC_PROCESS                              | X |   | X | X |
| GO_NUCLEOSIDE_MONOPHOSPHATE_METABOLIC_PROCESS                |   | X | X |   |
| GO_NUCLEOSIDE_PHOSPHATE_BIOSYNTHETIC_PROCESS                 | X |   | X | X |
| GO_NUCLEOSIDE_PHOSPHATE_METABOLIC_PROCESS                    | X | X | X | X |
| GO_NUCLEOSIDE_TRIPHOSPHATE_METABOLIC_PROCESS                 |   | X | X |   |
| GO_NUCLEOTIDE_BIOSYNTHETIC_PROCESS                           | X |   | X | X |
| GO_NUCLEOTIDE_METABOLIC_PROCESS                              | X | X | X | X |
| GO_POSITIVE_REGULATION_OF_MRNA_METABOLIC_PROCESS             |   |   |   | X |
| GO_PTERIDINE-CONTAINING_COMPOUND_METABOLIC_PROCESS           |   |   | X |   |
| GO_PURINE_DEOXYRIBONUCLEOSIDE_TRIPHOSPHATE_METABOLIC_PROCESS |   |   | X |   |
| GO_PURINE_DEOXYRIBONUCLEOTIDE_METABOLIC_PROCESS              |   |   | X |   |
| GO_PURINE_NUCLEOSIDE_BISPHOSPHATE_BIOSYNTHETIC_PROCESS       |   |   | X | X |
| GO_PURINE_NUCLEOSIDE_BISPHOSPHATE_METABOLIC_PROCESS          | X | X | X | X |
| GO_PURINE_NUCLEOSIDE_CATABOLIC_PROCESS                       |   |   | X |   |
| GO_PURINE_NUCLEOSIDE_METABOLIC_PROCESS                       |   |   | X | X |
| GO_PURINE_NUCLEOSIDE_MONOPHOSPHATE_METABOLIC_PROCESS         |   | X | X |   |
| GO_PURINE_NUCLEOSIDE_TRIPHOSPHATE_METABOLIC_PROCESS          |   | X | X |   |
| GO_PURINE_NUCLEOTIDE_BIOSYNTHETIC_PROCESS                    |   |   | X | X |
| GO_PURINE_NUCLEOTIDE_METABOLIC_PROCESS                       |   | X | X | X |
| GO_PURINE_RIBONUCLEOSIDE_CATABOLIC_PROCESS                   |   |   | X |   |
| GO_PURINE_RIBONUCLEOSIDE_METABOLIC_PROCESS                   | X |   | X | X |
| GO_PURINE_RIBONUCLEOSIDE_MONOPHOSPHATE_METABOLIC_PROCESS     |   | X | X |   |
| GO_PURINE_RIBONUCLEOSIDE_TRIPHOSPHATE_METABOLIC_PROCESS      |   | X | X |   |
| GO_PURINE_RIBONUCLEOTIDE_BIOSYNTHETIC_PROCESS                |   |   | X | X |
| GO_PURINE_RIBONUCLEOTIDE_METABOLIC_PROCESS                   |   | X | X | X |
| GO_PURINE-CONTAINING_COMPOUND_BIOSYNTHETIC_PROCESS           |   |   | X |   |
| GO_PURINE-CONTAINING_COMPOUND_CATABOLIC_PROCESS              |   |   | X |   |
| GO_PURINE-CONTAINING_COMPOUND_METABOLIC_PROCESS              | X | X | X | X |
| GO_PYRIDINE_NUCLEOTIDE_METABOLIC_PROCESS                     |   |   | X |   |
| GO_PYRIDINE-CONTAINING_COMPOUND_BIOSYNTHETIC_PROCESS         |   |   |   | X |
| GO_PYRIDINE-CONTAINING_COMPOUND_METABOLIC_PROCESS            | X |   | X |   |
| GO_PYRIMIDINE_NUCLEOSIDE_METABOLIC_PROCESS                   |   | X |   |   |
| GO_PYRIMIDINE-CONTAINING_COMPOUND_BIOSYNTHETIC_PROCESS       |   |   | X |   |
| GO_PYRIMIDINE-CONTAINING_COMPOUND_METABOLIC_PROCESS          |   | X |   |   |
| GO_REGULATION_OF_DNA_METABOLIC_PROCESS                       |   |   |   | X |
| GO_REGULATION_OF_MRNA_CATABOLIC_PROCESS                      |   |   |   | X |
| GO_REGULATION_OF_MRNA_METABOLIC_PROCESS                      |   |   |   | X |
| GO_RIBONUCLEOSIDE_BIOSYNTHETIC_PROCESS                       |   |   | X |   |
| GO_RIBONUCLEOSIDE_BISPHOSPHATE_BIOSYNTHETIC_PROCESS          |   |   | X | X |
| GO_RIBONUCLEOSIDE_BISPHOSPHATE_METABOLIC_PROCESS             | X | X | X | X |
| GO_RIBONUCLEOSIDE_METABOLIC_PROCESS                          | X |   | X | X |
| GO_RIBONUCLEOSIDE_MONOPHOSPHATE_METABOLIC_PROCESS            |   | X | X |   |
| GO_RIBONUCLEOSIDE_TRIPHOSPHATE_METABOLIC_PROCESS             |   | X | X |   |
| GO_RIBONUCLEOTIDE_BIOSYNTHETIC_PROCESS                       |   |   | X | X |
| GO_RIBONUCLEOTIDE_METABOLIC_PROCESS                          |   | X | X | X |
| GO_RNA_CATABOLIC_PROCESS                                     |   |   |   | X |
| GO_RNA-DEPENDENT_DNA_BIOSYNTHETIC_PROCESS                    |   | X |   |   |
| GO_RRNA_METABOLIC_PROCESS                                    |   |   | X | X |
| GO_TRNA_METABOLIC_PROCESS                                    |   |   |   | X |
| KEGG_PURINE_METABOLISM                                       |   |   | X | X |
| KEGG_PYRIMIDINE_METABOLISM                                   | X |   |   | X |
| REACTOME_METABOLISM_OF_NUCLEOTIDES                           | X |   | X |   |
| REACTOME_METABOLISM_OF_RNA                                   |   |   | X | X |
| REACTOME_PURINE_CATABOLISM                                   |   |   | X |   |
| REACTOME_PYRIMIDINE_SALVAGE                                  | X |   |   |   |
| WIKI_PURINE_METABOLISM                                       |   |   | X | X |

**Supplemental Table 2: Key Resources Table**, related to Methods.

| REAGENT or RESOURCE                                                                | SOURCE                     | IDENTIFIER                                         |
|------------------------------------------------------------------------------------|----------------------------|----------------------------------------------------|
| <b>Antibodies</b>                                                                  |                            |                                                    |
| Rb pAb to BMAL1                                                                    | Abcam                      | Cat#ab93806<br>RRID#AB_10675117<br>Lot#GR3368431-1 |
| Anti-GAPDH, MAb                                                                    | Invitrogen                 | Cat#AM4300<br>RRID#AB_437392<br>Lot#00959883       |
| Anti-mouse IgG, HRP-linked Antibody                                                | Cell Signalling Technology | Cat#7076S<br>RRID#AB_330924<br>Lot#33              |
| Anti-rabbit IgG, HRP-linked Antibody                                               | Cell Signalling Technology | Cat#7074S<br>RRID#AB_2099233<br>Lot#29             |
| <b>Bacterial and Virus Strains</b>                                                 |                            |                                                    |
| n/a                                                                                |                            |                                                    |
| <b>Biological Samples</b>                                                          |                            |                                                    |
| n/a                                                                                |                            |                                                    |
| <b>Chemicals, Peptides, and Recombinant Proteins</b>                               |                            |                                                    |
| 50% Dextrose Injection, USP                                                        | Hospira                    | Cat#00409-4902-34                                  |
| Sodium Pyruvate                                                                    | Sigma-Aldrich              | Cat#P5280                                          |
| Humulin R Insulin                                                                  | Eli Lilly                  | Cat#0002-8215-01                                   |
| pCPT-cAMP                                                                          | Sigma-Aldrich              | Cat#C3912                                          |
| DMEM low glucose, primary hepatocyte digestion & culture medium                    | Corning                    | Cat#10-014-CV                                      |
| DMEM high glucose, primary hepatocyte isolation medium                             | Gibco                      | Cat#11960-044                                      |
| Collagenase Type IV                                                                | Worthington Biochemical    | Cat#LS004188                                       |
| PBS with MgCl <sub>2</sub> and CaCl <sub>2</sub>                                   | Sigma-Aldrich              | Cat#D8662                                          |
| HEPES buffer                                                                       | Thermo Scientific          | Cat#15630080                                       |
| DMEM without glucose, L-glutamine, phenol red, sodium pyruvate, sodium bicarbonate | Sigma-Aldrich              | Cat#D5030                                          |
| SuperSignal West Pico PLUS Chemiluminescent Substrate                              | Thermo Scientific          | Cat#34580                                          |
| iTaq Universal SYBR Green Supermix                                                 | Bio-Rad                    | Cat#1725124                                        |
| TRIzol Reagent                                                                     | Ambion                     | Cat#1559018                                        |
| Phenol:Chloroform:Isoamylalcohol, 25:24:1                                          | Ambion                     | Cat#AM9732                                         |
| RIPA Buffer                                                                        | Thermo Scientific          | Cat#89900                                          |
| cOmplete Mini Protease Inhibitor Cocktail                                          | Sigma-Aldrich              | Cat#11836153001                                    |
| Vancomycin Hydrochloride from <i>Streptomyces Orientalis</i>                       | Sigma-Aldrich              | Cat#V2002                                          |
| Neomycin, Sulfate                                                                  | Fisher Scientific          | Cat#BP2669-25                                      |
| Cefoperazone Sodium Salt                                                           | Sigma-Aldrich              | Cat#C4292                                          |
| Ketathesia, 100 mg/mL                                                              | Henry Schein               | Cat#11695-0702-1                                   |
| Xylazine Injection, 20 mg/mL                                                       | Akorn Animal Health        | Cat#59399-110-20                                   |

|                                                                                                       |                               |                                                                                                                                                         |
|-------------------------------------------------------------------------------------------------------|-------------------------------|---------------------------------------------------------------------------------------------------------------------------------------------------------|
| 2-Metcaptoethanol BP176-100 Electrophoresis                                                           | Fisher Scientific             | CAS#60-24-2                                                                                                                                             |
| Bovine Serum Albumin                                                                                  | Sigma-Aldrich                 | Cat#A7906                                                                                                                                               |
| Critical Commercial Assays                                                                            |                               |                                                                                                                                                         |
| Quant-iT PicoGreen dsDNA Assay kit                                                                    | Invitrogen                    | REF#P7589                                                                                                                                               |
| Glycogen Assay Kit II (Colorimetric)                                                                  | Abcam                         | Cat#ab169558                                                                                                                                            |
| Ultra-sensitive Insulin ELISA                                                                         | ALPCO                         | Cat#80-INSMSU-E01                                                                                                                                       |
| Bicinchoninic Acid (BCA) Protein Assay                                                                | Thermo Scientific             | Cat#PI23228                                                                                                                                             |
| Autokit Glucose                                                                                       | FUJIFILM Medical Systems USA  | Cat#99703001                                                                                                                                            |
| Deposited Data                                                                                        |                               |                                                                                                                                                         |
| 16S rRNA amplicon raw sequencing reads                                                                | NCBI BioProject               | <a href="https://www.ncbi.nlm.nih.gov/bioproject/">https://www.ncbi.nlm.nih.gov/bioproject/</a> ; Accession#PRJNA815335                                 |
| mRNA raw sequencing reads                                                                             | NCBI GEO                      | <a href="https://www.ncbi.nlm.nih.gov/geo/">https://www.ncbi.nlm.nih.gov/geo/</a> ; Accession#GSE184303                                                 |
| Experimental Models: Cell Lines                                                                       |                               |                                                                                                                                                         |
| n/a                                                                                                   |                               |                                                                                                                                                         |
| Experimental Models: Organisms/Strains                                                                |                               |                                                                                                                                                         |
| Mouse: <i>Bmal1</i> <sup>flox/flox</sup> (B6.129S4(Cg)- <i>Arnt</i> <sup>f<sup>m1</sup>Weit/J</sup> ) | The Jackson Laboratory        | Strain#007668<br>RRID#IMSR_JAX:007668                                                                                                                   |
| Mouse: Albumin-Cre (B6.Cg- <i>Speer6-ps1</i> <sup>Tg(Alb-cre)21Mgn/J</sup> )                          | The Jackson Laboratory        | Strain#003574<br>RRID#IMSR_JAX:003574                                                                                                                   |
| Mouse: Cami-Cre (B6 background)                                                                       | Dr. Joseph Takahashi          | n/a                                                                                                                                                     |
| Oligonucleotides                                                                                      |                               |                                                                                                                                                         |
| 16S_F: 5'-GTGYCAGCMGCCGCGGTA-3'                                                                       | Earth Microbiome Project      | 210570681                                                                                                                                               |
| 16S_R: 5'-GGACTACNVGGGTWTCTAAT-3'                                                                     | Earth Microbiome Project      | 210570682                                                                                                                                               |
| Recombinant DNA                                                                                       |                               |                                                                                                                                                         |
| n/a                                                                                                   |                               |                                                                                                                                                         |
| Software and Algorithms                                                                               |                               |                                                                                                                                                         |
| Graphpad Prism 9                                                                                      | Graphpad software             | <a href="https://graphpad.com/scientific-software/prism">https://graphpad.com/scientific-software/prism</a>                                             |
| Empirical JTK_CYCLE                                                                                   | Hutchison <i>et al.</i> 2015  | <a href="https://github.com/alanlhutchison/empirical-JTK_CYCLE-with-asymmetry">https://github.com/alanlhutchison/empirical-JTK_CYCLE-with-asymmetry</a> |
| QIIME2                                                                                                | Hall and Beiko, 2018          | <a href="https://qiime2.org">https://qiime2.org</a>                                                                                                     |
| ImageJ                                                                                                | Schindelin <i>et al.</i> 2015 | imagej.net                                                                                                                                              |
| Adobe illustrator CC2020                                                                              | Adobe                         | <a href="https://www.adobe.com/product/photoshop.html">https://www.adobe.com/product/photoshop.html</a>                                                 |
| Orange3                                                                                               | Demsar <i>et al.</i> , 2013   | <a href="https://orangedatamining.com">https://orangedatamining.com</a>                                                                                 |
| CircWave V1.4                                                                                         | Roelof A. Hut <i>et al.</i>   | <a href="https://euclock.org/results/item/circ-wave.html">https://euclock.org/results/item/circ-wave.html</a>                                           |

|                                                 |                                   |                                                                                     |
|-------------------------------------------------|-----------------------------------|-------------------------------------------------------------------------------------|
| Metascape                                       | Zhou <i>et al.</i> , 2019         | <a href="http://metascape.org">http://metascape.org</a>                             |
| Cytoscape v3.8.1                                | Cline <i>et al.</i> , 2007        | <a href="https://cytoscape.org/">https://cytoscape.org/</a>                         |
| STAR v2.6.1b                                    | Dobin <i>et al.</i> , 2013        | <a href="https://github.com/alexdobin/STAR">https://github.com/alexdobin/STAR</a>   |
| DESeq2                                          | Love <i>et al.</i> , 2014         | <a href="https://github.com/mikelove/DESeq2">https://github.com/mikelove/DESeq2</a> |
| fGSEA                                           | Sergushichev <i>et al.</i> , 2016 | <a href="https://github.com/ctlab/fgsea">https://github.com/ctlab/fgsea</a>         |
| Other                                           |                                   |                                                                                     |
| JL Rat and Mouse/Auto 6F                        | LabDiet                           | Cat#5k67                                                                            |
| 0.1-mm-diameter zirconia/silica beads           | BioSpec Products                  | Cat#11079101Z                                                                       |
| Accu-Check Compact Plus Diabetes Monitoring Kit | Roche Diabetes Care               | Cat#RO0510-01                                                                       |
| OneTouch Blood Glucose Monitoring System        | OneTouch                          | Cat#024046                                                                          |
| Mini-PROTEAN TGX Stain-Free Gel                 | Bio-Rad                           | CAT#: 4568093                                                                       |
| Immobilon PVDF Transfer Membrane                | Millipore                         | IPFL00010                                                                           |
| Heparin-coated microvette tubes                 | Sarstedt                          | Cat#16443100                                                                        |
| 6-well collagen-coated plates                   | Thermo Scientific                 | Cat#LS004188                                                                        |
| Accucheck Compack Test Strips                   | Roche Diabetes Care               | Cat#FBA_TM82070                                                                     |
| OneTouch Ultra Blood Glucose Test Strips        | OneTouch                          | Cat#LI020-994                                                                       |
